# Supplementary material for: Validity of the PROMIS-10 Global Health assessed by telephone and on paper in minor stroke and transient ischaemic attack in the Netherlands
Source: PubMed Central journal article supplement — BMJ Open. 2018 Jul 11;8(7):e019919. doi: 10.1136/bmjopen-2017-019919 (PMC6089319; doi:10.1136/bmjopen-2017-019919), 2018-07-11
Supplement: bmjopen-2017-019919.draft_revisions.pdf [file bmjopen-2017-019919.draft_revisions.pdf]

# BMJ Open

BMJ Open is committed to open peer review. As part of this commitment we make the peer review history of every article we publish publicly available.

When an article is published we post the peer reviewers' comments and the authors' responses online. We also post the versions of the paper that were used during peer review. These are the versions that the peer review comments apply to.

The versions of the paper that follow are the versions that were submitted during the peer review process. They are not the versions of record or the final published versions. They should not be cited or distributed as the published version of this manuscript.

BMJ Open is an open access journal and the full, final, typeset and author-corrected version of record of the manuscript is available on our site with no access controls, subscription charges or pay-per-view fees (<http://bmjopen.bmj.com>).

If you have any questions on BMJ Open's open peer review process please email [info.bmjopen@bmj.com](mailto:info.bmjopen@bmj.com)

# BMJ Open

## The PROMIS-10 Global Health in minor stroke and transient ischemic attack: on paper versus telephone assessment

|                                 |                                                                                           |
|---------------------------------|-------------------------------------------------------------------------------------------|
| Journal:                        | <i>BMJ Open</i>                                                                           |
| Manuscript ID                   | bmjopen-2017-019919                                                                       |
| Article Type:                   | Research                                                                                  |
| Date Submitted by the Author:   | 20-Nov-2017                                                                               |
| Complete List of Authors:       | Lam, Ka-Hoo; OLVG, Neurology<br>Kwa, Vincent; Onze Lieve Vrouwe Gasthuis, Neurology       |
| <b>Primary Subject Heading</b>: | Neurology                                                                                 |
| Secondary Subject Heading:      | Global health                                                                             |
| Keywords:                       | Stroke < NEUROLOGY, Transient ischemic attack, Quality of life, Patient-reported outcomes |
|                                 |                                                                                           |

SCHOLARONE™  
Manuscripts

Peer Review Only

**Title**

The PROMIS-10 Global Health in minor stroke and transient ischemic attack: on paper versus telephone assessment

**Running title**

PROMIS-10 in minor stroke and transient ischemic attack

**Authors**

1. Ka-Hoo Lam, MD, department of Neurology, OLVG Oost hospital, Oosterpark 9, 1091AC Amsterdam, the Netherlands. ORCID: 0000-0003-0926-1445.
2. Vincent I.H. Kwa, MD, PhD, department of Neurology, OLVG Oost hospital, Oosterpark 9, 1091AC Amsterdam, the Netherlands. ORCID: 0000-0002-0942-6206.

**Corresponding author**

Vincent I.H. Kwa

Telephone: +31205993044

Fax: +31205993845

E-mail: v.i.h.kwa@olvg.nl

## Abstract

*Objectives:* As stroke remains an important cause of burden of disease, measuring outcome is important for continuing improvement in stroke care. As dysfunction in transient ischemic attack (TIA) and minor stroke patients is often underestimated by clinical measures and healthcare is shifting towards value-based approach, patient-reported outcomes of increasing interest. In addition, with the shift towards value-based healthcare. The PROMIS-10 Global Health is a concise patient-centered outcome measuring tool proposed for assessing health in stroke patients. This study aims to address the validity of the Dutch PROMIS-10 in stroke patients in the Netherlands and also aims to compare telephone to on paper assessment.

*Design:* Observational cohort study.

*Setting:* Single-center hospital in the Netherlands.

*Participants:* 75 patients who were diagnosed with TIA or minor stroke and discharged without rehabilitation treatment one year ago (between December 2014 and January 2016) completed the study.

### *Primary and secondary outcome measures*

PROMIS-10 physical and mental health scores assessed one year post-stroke on paper ( $n = 37$ ) and by telephone ( $n = 38$ ) was compared to RAND-36 physical and mental component scores assessed on paper.

*Results:* PROMIS-10 and RAND-36 correlated significantly in physical health,  $r = .81$ , 95% CI [.69, .88], and mental health,  $r = .76$ , 95% CI [.64, .85]. Paper-and-pencil assessed correlations were  $r = .87$  and  $.79$  for physical and mental health, respectively. Telephone assessed correlations were  $r = .76$  and  $.73$  for physical and mental health, respectively. Internal consistency analysis indicated high reliabilities for both health components of the PROMIS-10, all Cronbach's  $\alpha > .70$ .

*Conclusions:* The Dutch PROMIS-10 was found to strongly correlate with the RAND-36. Paper-and-pencil assessment was found to have a higher correlation than telephone assessment. This study provides support for the use of the Dutch PROMIS-10 in assessing health status in patients after mild stroke.

### **Strengths and limitations of this study**

- Limited sample size.
- Subject characteristics were evenly distributed among all groups.
- Different timing between on paper and telephone assessment.

- Additional potential confounding factors for self-reported quality of life such as individual personality traits, extent of social support, socio-economic status and ethnicity were not accounted for in this study.

**Keywords:** quality of life, patient-reported outcomes, stroke, transient ischemic attack

## Introduction

While mortality rates have declined, the incidence of ischemic stroke remained stable or even slightly increased [1]. Following stroke many patients experience persistent deficits and reduced functional independence [2]. Consequently, in 2010 stroke ranks third in leading causes of disability-adjusted life years globally, with the burden of disease increasing with age and in the more developed regions [3]. In 2013 in the Netherlands, the incidence for stroke and transient ischemic attack (TIA) was 0.25 and 0.33 per 100 inhabitants, respectively [4].

Patients usually receive further rehabilitation treatment after suffering a major stroke [2]. While full recovery is assumed in TIA and minor stroke patients who are discharged to home without further rehabilitation treatment [5]. However, previous studies in TIA and minor stroke patients found high prevalences of dysfunction across all domains of health, of which cognitive and emotional problems were most notable [6-9]. These symptoms may be overlooked with conventional clinical measures such as the neurological examination or the Barthel Index, but can be a major contributor to an impaired performance of activities of daily living and a diminished quality of life (QoL) [5,10-12].

This emphasizes the importance of patient-reported outcomes (PROs); health status reported directly from the patient [13]. Measuring PROs is also an essential principal in the emerging value-based health care [14]. As such, health measurement is shifting from process measurement towards outcome measurement to improve quality while reducing costs [15]. This initiated the proposal of a Stroke Standard Set for measuring health in stroke by the International Consortium for Health Outcomes Measurement (ICHOM) [16]. The expert group recommends the Patient Reported Outcomes Measurement Information System 10-Question Short Form (PROMIS-10 Global Health) for assessing health status after stroke [17]. In the Netherlands, the PROMIS-10 has been translated into Dutch by the Dutch-Flemish PROMIS group (<http://www.dutchflemishpromis.nl>) [18]. However, validity and comparisons to existing validated instruments has yet to be addressed.

### *Aims*

This study aims to investigate the construct validity and reliability of the Dutch PROMIS-10 in TIA and minor stroke patients in the Netherlands. We also aim to evaluate different assessment methods of the PROMIS-10: on paper (filled in by the patient) assessment versus assessment through the telephone. As telephone assessment might be more feasible in the population of stroke patients, which mainly consists of elderly patients.

## **Methods**

### *Study design*

This single-center observational cohort study was part of a concurrent QoL study at OLVG Oost hospital. Between January 2016 and January 2017, patients diagnosed with a TIA or minor stroke one year ago were consecutively approached by telephone for study participation. Following verbal consent, study materials were sent by mail; study information, consent form, PROMIS-10, RAND-36, and a short form for obtaining socio-demographic data. PROMIS-10 was assessed on paper during the first half of the study, and by telephone for the second half. On paper assessments of the PROMIS-10 and RAND-36 were completed by the patients at home on their own or with help of a proxy. Telephone assessments of the PROMIS-10 were carried out by one researcher by reading out the exact questions and mark the given answers. Clinical data were extracted from medical records. Full ethical approval was given by the Medical research Ethics Committees United (MEC-U), Nieuwegein. Informed consent was obtained from all individual participants included in the study.

### *Subjects*

Eligibility included a diagnosis of TIA or minor stroke followed by discharge without inpatient rehabilitation treatment. For this study TIA and minor stroke were defined as acute neurological deficits with symptoms of stroke on admission that fully resolves within 24 hours and three days, respectively.

As standard practice TIA and stroke patients discharged to home are re-evaluated shortly after discharge by a specialized stroke nurse. If residual or new symptoms are present or suspected, patients are referred to the Beroerte Adviescentrum (BAC, 'Stroke Advice Center'), a central body that coordinates and effectuates outpatient care for stroke patients. As the BAC also measures baseline health status, which is an inclusion criterion for the

1  
2  
3 concurrent QoL study, patients who were not referred to the BAC or did not complete baseline measurements were  
4 not included.

5  
6 Exclusion criteria were: age below 18 years, persistent neurological symptoms three days post-stroke,  
7 insufficient proficiency in Dutch, dementia or any behavioral disorder that may compromise study participation.  
8  
9

### 10 11 12 *Measures*

13  
14 The PROMIS-10 is a 10-item measure for self-reported QoL, physical health, and mental health. It has been shown  
15 to be reliable, precise and comparable to legacy instruments [19]. Physical health (PH) and mental health (MH) T-  
16 scores can be calculated through an online scoring service provided by Assessment Center  
17 (www.assessmentcenter.net/ac\_scoring-service). The T-score distributions are standardized with mean (*SD*) of 50  
18 (10) for the United States' (US) general population, where higher scores indicates better outcome. In this study a  
19 Dutch version of the PROMIS-10 was used [18]. As standardized scores for the Netherlands are unavailable, T-  
20 scores were calculated using the US population standard scores.  
21  
22  
23  
24  
25  
26  
27

28 The RAND-36 (identical to the SF-36) is a widely used QoL measure, comprising of 36 items covering a  
29 wide range of health domains [20]. Two component scores can be derived: physical (PCS) and mental (MCS)  
30 component score. PCS and MCS are standardized with mean (*SD*) of 50 (10), with higher scores reflecting better  
31 outcome. The RAND-36 has been translated and validated into multiple languages, including Dutch [21]. In this  
32 study the Dutch RAND-36 version 2 was used. However, PCS and MCS were calculated using US-standardized  
33 weights for a more equal comparison to the PROMIS-10, which was calculated similarly.  
34  
35  
36  
37  
38

39 Socio-demographic data collected were: marital status, level of education (assessed on the Dutch 7-point  
40 scale 'schaal van Verhage', and afterwards stratified into three groups), living arrangement, and working status.  
41  
42  
43  
44

### 45 *Data analysis*

46 Numerical variables were summarized by the mean  $\pm$  *SD*, and frequencies and percentages were used for binary and  
47 categorical variables. Differences in patient characteristics were assessed using the independent samples *t*-test and  $\chi^2$   
48 test. For assessing construct validity, correlation between PROMIS-10 and RAND-36 was assessed by calculating  
49 Pearson's correlation coefficient (*r*), with a bias corrected and accelerated bootstrapping (BCa) method providing  
50 95% confidence intervals. An independent samples *t*-test was performed for assessing differences between  
51  
52  
53  
54  
55  
56  
57  
58  
59  
60

assessment methods of the PROMIS-10. For the internal consistency of the PROMIS-10, reliability analysis was used to calculate Cronbach's  $\alpha$ s for both physical (4 items) and mental (4 items) subscales. A cut-off point of  $\geq .70$  was chosen for indication of good reliability ( $\alpha$ ) and correlation ( $r$ ) [22]. A  $p$ -value of  $< .05$  was considered to be statistically significant. All statistical analysis was performed using IBM SPSS version 22.

## Results

A total of 592 patients were identified who were diagnosed with a TIA or minor stroke one year prior to the assessment (from December 2014 to January 2016). Following re-evaluation by their physician, 291 patients were referred to the BAC for follow-up care. 26 patients were excluded as they originated from a different region or country and 8 died before BAC follow-up. Of the remaining 257 eligible patients, 75 patients were included for the study and 182 were non-respondents (108 had no baseline measurements, 12 were insufficient proficient in Dutch, 11 died before follow-up at one year post-stroke, 6 had dementia or a behavioral disorder, 28 refused participation, 13 were not responsive, and 4 were not reachable by phone).

Of the 75 included patients, mean age was  $68.9 \pm 11.2$  years, 51 (68.0%) were male, 60 (80.0%) had their first-ever ischemic event, 49 (65.3%) had the diagnosis minor stroke and 26 (34.7%) TIA. The ischemic event was located in the left hemisphere in 30 (40.0%) patients, 23 (30.7%) in the right hemisphere, and 22 (29.3%) were vertebrobasilar. There were no statistically significant differences between the study population and the non-respondents. Mean ( $SD$ ) scores for the PROMIS-10 were 45.8 (9.9) for PH, and 49.6 (9.1) for MH. Scores for the RAND-36 were 43.7 (11.4) for PCS, and 49.9 (10.7) for MCS.

In 37 patients the PROMIS-10 and RAND-36 were assessed on paper; two had missing values in the physical component, and one in both components of the PROMIS-10, another patient had missing values in both components of the RAND-36. These 37 patients formed the 'paper-and-pencil group'. 38 patients completed the PROMIS-10 by telephone (and the RAND-36 on paper), these patients formed the 'telephone group'. Patient characteristics of both groups are summarized in table 1. No statistically significant differences were observed between the two groups.



**Table 1. Patient characteristics between the study population (n = 75, divided in 'paper-and-pencil' and 'telephone' group) and non-respondents (n = 182)**

| Characteristic                              | Study population (n = 75)   |                      | Non-respondents (n = 182) |
|---------------------------------------------|-----------------------------|----------------------|---------------------------|
|                                             | 'Paper-and-pencil' (n = 37) | 'Telephone' (n = 38) |                           |
| Days between onset and follow-up, mean (SD) | 374.8 (59.7)                | 375.7 (30.7)         | n/a                       |
| Age, y, mean (SD)                           | 67.4 (9.9)                  | 70.4 (12.2)          | 68.5 (12.2)               |
| Gender                                      |                             |                      |                           |
| Female                                      | 9 (24.3)                    | 15 (39.5)            | 82 (45.1)                 |
| Male                                        | 28 (75.7)                   | 23 (60.5)            | 100 (54.9)                |
| Diagnosis                                   |                             |                      |                           |
| TIA                                         | 10 (27.0)                   | 16 (42.1)            | 44 (24.2)                 |
| Minor stroke                                | 27 (73.0)                   | 22 (57.9)            | 138 (75.8)                |
| Localization                                |                             |                      |                           |
| Right hemisphere                            | 12 (32.4)                   | 11 (28.9)            | 51 (28.0)                 |
| Left hemisphere                             | 14 (37.8)                   | 16 (42.1)            | 77 (42.3)                 |
| Vertebrobasilar                             | 11 (29.7)                   | 11 (28.9)            | 47 (25.8)                 |
| Ocular                                      | 0 (0.0)                     | 0 (0.0)              | 3 (1.6)                   |
| Other/unknown                               | 0 (0.0)                     | 0 (0.0)              | 4 (2.2)                   |
| Stroke incidence                            |                             |                      |                           |
| First ever                                  | 29 (78.4)                   | 31 (81.6)            | 138 (75.8)                |
| Relapse                                     | 8 (21.6)                    | 7 (18.4)             | 44 (24.2)                 |
| Marital status                              |                             |                      |                           |
| Married                                     | 22 (59.5)                   | 22 (57.9)            | n/a                       |
| Unmarried                                   | 13 (35.1)                   | 14 (36.8)            | n/a                       |
| Widowed                                     | 2 (5.4)                     | 2 (5.3)              | n/a                       |
| Education                                   |                             |                      |                           |

|                          |           |           |     |
|--------------------------|-----------|-----------|-----|
| Low                      | 5 (13.9)  | 3 (7.9)   | n/a |
| Average                  | 16 (44.4) | 21 (55.3) | n/a |
| High                     | 15 (41.7) | 14 (36.8) | n/a |
| Living arrangement       |           |           |     |
| Alone                    | 15 (40.5) | 15 (39.5) | n/a |
| With spouse/relative(s)  | 22 (59.5) | 23 (60.5) | n/a |
| Current work status      |           |           |     |
| Back to work             | 8 (21.6)  | 8 (21.1)  | n/a |
| Not (fully) back to work | 6 (16.2)  | 7 (18.4)  | n/a |
| Retired                  | 23 (62.2) | 23 (60.5) | n/a |

Abbreviations: TIA = transient ischemic attack, n/a = not available. All data are expressed as n (%), except where specified. All differences were not statistically significant (all  $p$ s > .05).

### Construct validity

PROMIS-10 and RAND-36 physical and mental scores correlated significantly,  $r = .81$ , BCa CI [.69, .88],  $p < .001$ , and  $r = .76$ , BCa CI [.64, .85],  $p < .001$ , respectively (see figure 1). When scores for the PROMIS-10 PH and MH were divided between 'paper-and-pencil' and 'telephone' groups, correlation between the PROMIS-10 and RAND-36 physical and mental health increased in the 'paper-and-pencil' group, and decreased in the 'telephone' group. The results are summarized in table 2.

**Figure 1.** Scatterplots of PROMIS-10 and RAND-36 physical scores (A) and mental scores (B).

[Insert Figure 1.]

**Table 2. Bivariate correlations between PROMIS-10 and RAND-36**

|  | RAND-36 |     | <i>n</i> |
|--|---------|-----|----------|
|  | PCS     | MCS |          |
|  |         |     |          |

|                              |                    |                    |    |
|------------------------------|--------------------|--------------------|----|
| PROMIS-10                    |                    |                    |    |
| PH                           | .82*<br>[.70, .90] | —                  | 71 |
| MH                           | —                  | .70*<br>[.57, .82] | 73 |
| PROMIS-10 (paper-and-pencil) |                    |                    |    |
| PH                           | .88*<br>[.78, .90] | —                  | 33 |
| MH                           | —                  | .70*<br>[.54, .84] | 35 |
| PROMIS-10 (telephone)        |                    |                    |    |
| PH                           | .77*<br>[.54, .91] | —                  | 38 |
| MH                           | —                  | .70*<br>[.50, .86] | 38 |

\*p < .01. BCa bootstrap 95% CIs reported in brackets. Abbreviations: PCS = physical component score, MCS = mental component score, PH = physical health, MH = mental health.

When comparing assessment methods, the mean PH score was lower in the 'paper-and-pencil' group than in the 'telephone' group. This difference was not statistically significant. The mean MH score was also lower in the 'paper-and-pencil' group than in the 'telephone' group. This difference however, was statistically significant (see figure 2). Mean scores of the RAND-36 PCS and MCS were not statistically significantly different among the two groups based on assessment method of PROMIS-10. The results are summarized in table 3.

**Figure 2.** Boxplots of PROMIS-10 physical health (A) and mental health (B), divided between paper-and-pencil and telephone assessment.

[Insert Figure 2.]

**Table 3. Independent samples t-tests comparing PROMIS-10 and RAND-36, between 'paper-and-pencil' and 'telephone' group**

|              | 'Paper-and-pencil' |    | 'Telephone' |    | 95% CI for mean difference | t-value (df) | p-value |
|--------------|--------------------|----|-------------|----|----------------------------|--------------|---------|
|              | Mean (SD)          | n  | Mean (SD)   | n  |                            |              |         |
| PROMIS-10 PH | 44.1 (10.1)        | 34 | 47.2 (9.5)  | 38 | -7.67, 1.57                | -1.32 (70)   | .192    |
| PROMIS-10 MH | 45.6 (8.5)         | 36 | 53.4 (8.0)  | 38 | -11.57, -3.90              | -4.02 (72)   | .001    |
| RAND-36 PCS  | 48.7 (12.2)        | 36 | 51.0 (11.8) | 38 | -7.86, 3.27                | -0.82 (72)   | .414    |
| RAND-36 MCS  | 34.7 (8.4)         | 36 | 37.7 (7.6)  | 38 | -6.64, 0.80                | -1.56 (72)   | .122    |

Abbreviations: PH = physical health, MH = mental health, PCS = physical component score, MCS = mental component score.

### Internal consistency

The PROMIS-10 demonstrated high reliabilities for both PH, Cronbach's  $\alpha = .79$ , and MH, Cronbach's  $\alpha = .83$ .

Similar  $\alpha$ s were observed for the PROMIS-10 assessed by paper-and-pencil and telephone:  $\alpha = .82$  and  $.81$  for PH and MH, respectively, in the 'paper-and-pencil' group;  $\alpha = .77$  and  $.80$  for PH and MH, respectively, in the 'telephone' group.

### Discussion

In this study we used the Dutch PROMIS-10 to assess QoL in patients at one year after TIA or minor stroke. Our results indicate an overall strong correlation between the PROMIS-10 and the RAND-36. QoL attributed to physical health was found to have a higher correlation than QoL attributed to mental health. This could be explained due to physical health tending to be more objective and consistent over time. Whereas mental health is generally more subjective and prone to fluctuations. Nonetheless, both correlations were within the range considered to be moderate to high.

Subsequently, we compared two assessment methods of the PROMIS-10. In both physical and mental health, telephone assessment was found to be inferior to assessment by paper-and-pencil. No studies were found that addressed the validity of telephone assessment of the PROMIS-10. Two studies however, evaluated telephone assessment of other PROMIS measures [23,24]. In line with our results, both studies provide support for telephone assessment. One of the studies compared telephone to self-administered assessment; aside from small mode effects

1  
2  
3 most likely related to study design, no apparent differences were reported as was found in our study [24]. In our  
4 study we suspect that lack of visual support when choosing a score within a range might have been contributing to a  
5 lower correlation. Other noted caveats in telephone assessment in our study were hesitation, choosing scores in  
6 between, and the tendency to substantiate choices during assessment.  
7  
8  
9

10 When comparing PROMIS-10 and RAND-36 scores between the 'paper-and-pencil' and 'telephone'  
11 group, it is notable that scores of the on paper assessed RAND-36 were similar in both physical and mental health,  
12 whereas PROMIS-10 scores were significantly higher (i.e. better) in the 'telephone' group compared to the 'paper-  
13 and-pencil' group. We speculate that patients could be inclined to appear better, answer more socially desirable, and  
14 are less inclined to open up about mental problems in a direct telephone interview, as opposed to on paper  
15 assessment.  
16  
17  
18  
19  
20  
21

22 Gender could be another possible contributing factor for the observed difference in mental health in our  
23 two groups. Although not significant, there were slightly more women in our 'telephone' group compared to the  
24 'paper-and-pencil' group. Muus et al. (2010), who studied a similar population, reported that women tend to have  
25 ischemic stroke at a higher age and having more severe strokes compared to men [7]. In our study however, mental  
26 health was found to be similar between both genders. The difference in mental health between our 'telephone' and  
27 'paper-and-pencil' group is therefore not likely to be attributable to gender.  
28  
29  
30  
31  
32

33 Other possible causes of the difference between our PROMIS-10 'telephone' and 'paper-and-pencil'  
34 group could be that the former group comprises of healthier patients. Although not significant, our 'telephone' group  
35 comprised of slightly more TIA patients, who are expected to have better outcomes than minor stroke patients.  
36 However, when taking diagnosis into account, physical and mental scores between the two groups did not  
37 significantly differ for both PROMIS-10 and RAND-36. The remaining patient characteristics obtained in this study  
38 were nearly identically distributed among both groups, and are therefore unlikely to have confounded the results.  
39  
40  
41  
42  
43  
44  
45  
46

#### 47 *Limitations*

48 The generalizability of our results is reduced due to our small sample size. Moreover, our study population does not  
49 cover the full range of stroke patients. Aside from exclusion of major stroke, as our target population were TIA and  
50 minor stroke patients, a large number of patients were not included as referral to the BAC based on symptoms was  
51 not indicated. Nonetheless, these relatively mildly affected patients still represent part of our target population. The  
52  
53  
54  
55  
56  
57  
58  
59  
60

1  
2  
3 same applies to patients who were excluded due to an insufficient proficiency in Dutch. In contrast to  
4 generalizability, these limitations should barely affect our results, as patient characteristics were similar among the  
5 included patients and the non-respondents.  
6  
7

8  
9 Noteworthy is the mean (*SD*) of 9.4 (14.7) days between assessment of RAND-36 on paper and  
10 assessment of PROMIS-10 by telephone in our 'telephone' group. On the other hand, on paper assessment of the  
11 PROMIS-10 is (assumed to be) completed on the same day. Health status might change over these few days.  
12  
13 Moreover, three items of PROMIS-10 are concerned with the past seven days (fatigue, emotional problems, and  
14 pain).  
15  
16  
17

18  
19 Time of measurement of health status in stroke should also be taken into account. We assessed the  
20 PROMIS-10 at one year post-stroke, in contrast to the 3 months post-stroke proposed by the ICHOM consensus  
21 group[16]. As Mierlo et al. (2016) reported improvement of quality of life occurs up to one year after stroke, with  
22 most changes occurring within the first six months [25].  
23  
24  
25

26  
27 Lastly, possible confounding factors such as individual personality traits, extent of social support, socio-  
28 economic status and ethnicity was not accounted for in this study, while these factors undoubtedly impact self-  
29 reported quality of life.  
30  
31  
32

### 33 *Conclusions*

34  
35 This study provides support for the use of the Dutch version of the PROMIS-10 in patients after minor stroke or TIA  
36 in the Netherlands. Despite satisfactory validity of telephone assessment, careful interpretation is advised, especially  
37 when addressing mental health status. Additional data and further research with the PROMIS-10 in stroke patients is  
38 desirable for establishing more firm results.  
39  
40  
41  
42  
43  
44

### 45 **Contributorship statement**

46  
47 K.H. Lam and V.I.H. Kwa state that the following criteria for contributorship, in accordance to the ICMJE criteria  
48 for authorship, are met:  
49

- 50  
51 - Substantial contributions to the conception or design of the work; or the acquisition, analysis, or interpretation of  
52 data for the work; AND  
53  
54 - Drafting the work or revising it critically for important intellectual content; AND  
55  
56  
57  
58  
59  
60

1  
2  
3 - Final approval of the version to be published; AND

4  
5 - Agreement to be accountable for all aspects of the work in ensuring that questions related to the accuracy or  
6  
7 integrity of any part of the work are appropriately investigated and resolved.  
8  
9

10 In addition to being accountable for the parts of the work the authors have done, all authors are able to identify which  
11  
12 co-authors are responsible for specific other parts of the work. In addition, the authors have confidence in the  
13  
14 integrity of the contributions of our co-authors.  
15  
16

### 17 18 **Acknowledgements**

19  
20 The authors would like to thank M. Lagerwaard for data collection, the BAC-team: I. Bekker, J. Kramer, and B.  
21  
22 Notz, for their continuous efforts in improving care for stroke patients, C. Terwee for technical support with the  
23  
24 PROMIS-10, and D. van Rooijen for providing support in statistical analysis.  
25  
26

### 27 28 **Competing interests**

29  
30 The authors declare that they have no competing interests.  
31  
32

### 33 34 **Funding statement**

35  
36 This research received no specific grant from any funding agency in the public, commercial or not-for-profit sectors.  
37  
38

### 39 40 **Data sharing statement**

41  
42 Individual participant data collected during the study that underlie the results reported in the manuscript, after  
43  
44 deidentification (text, tables and figures), will be available for data sharing. The data will be available immediately  
45  
46 after publication and ends 36 months after publication. The data will be available to investigators whose proposed  
47  
48 use of the data has been approved by an independent review committee. Up to 36 months after publication, the data  
49  
50 can be requested and accessed electronically.  
51  
52  
53  
54  
55  
56  
57  
58  
59  
60

## References

1. Vaartjes I, O'Flaherty M, Capewell S, Kapelle J, and Bots M. Remarkable decline in ischemic stroke mortality is not matched by changes in incidence. *Stroke*, 2013;44:591-597.
2. Winstein CJ, Stein J, Arena R, et al. Guidelines for adult stroke rehabilitation and recovery: a guideline for healthcare professionals from the American Heart Association/American Stroke Association. *Stroke*, 2016;47:98-169.
3. Murray CJL, Vos T, Lozano R, et al. Disability-adjusted life years (DALYs) for 291 diseases and injuries in 21 regions, 1990-2010: a systematic analysis for the Global Burden of Disease Study 2010. *Lancet*, 2012;380:2197-2223.
4. Bots M, Buddeke J, van Dis I, Vaartjes I, and Visseren FLJ. Hart- en vaatziekten in Nederland 2015. *De Hartstichting*, December 2015.
5. Edwards DF, Hahn M, Baum C, and Dromerick AW. The impact of mild stroke on meaningful activity and life satisfactions. *Journal of Stroke and Cerebrovascular Diseases*, 2006;15:151-157.
6. Arts MLJ, Kwa VIH, and Dahmen R. High satisfaction with an individualised stroke care programme after hospitalization of patients with a TIA or minor stroke: a pilot study. *Cerebrovascular Diseases*, 2008;25:566-571.
7. Muus I, Petzold M, and Ringsberg KC. Health-related quality of life among Danish patients 3 and 12 months after TIA or mild stroke. *Scandinavian Journal of Caring Sciences*, 2010;24:211-218.
8. Radman N, Staub F, Aboulafia-Brakha A, Bogousslavsky J, and Annoni JM. Poststroke fatigue following minor infarcts: a prospective study. *Neurology*, 2012;79:1422-1427.
9. Moran GM, Fletcher B, Feltham MG, Calvert M, Sackley C, and Marshall T. Fatigue, psychological and cognitive impairment following transient ischaemic attack and minor stroke: a systematic review. *European Journal of Neurology*, 2014;21:1258-1267.
10. Duncan PW, Samsa GP, Weinberger M, et al. Health status of individuals with mild stroke. *Stroke*, 1997;28:740-745.
11. Suenkeler IH, Nowak M, Misselwitz B, et al. Timecourse of health-related quality of life as determined 3, 6 and 12 months after stroke: relationship to neurological deficit, disability and depression. *Journal of Neurology*, 2002;249:1160-1167.



- 1  
2  
3 12. Verbraak ME, Hoeksma AF, Lindeboom R, and Kwa VIH. Subtle problems in activities of daily living after  
4 a Transient Ischemic Attack or an apparently fully recovered  
5 non-disabling stroke. *Journal of Stroke and Cerebrovascular Diseases*, 2012;21:124-130.  
6  
7 13. Higgins JPT and Greene S. Cochrane handbook for systematic reviews of interventions version 5.1.0.  
8 <http://handbook.cochrane.org> (updated March 2011).  
9  
10 14. Porter ME. Value-based health care delivery. *Annals of Surgery*, 2008;248:503-509.  
11  
12 15. Porter ME. What is value in health care? *New England Journal of Medicine*, 2010;363:2477-2481.  
13  
14 16. Salinas J, Sprinkhuizen SM, Ackerson T, et al. An international standard set of patient-centered outcome  
15 measures after stroke. *Stroke*, 2016;47:180-186.  
16  
17 17. Cella D, Yount S, Rothrock N, et al. The Patient-Reported Outcomes Measurement Information System  
18 (PROMIS): Progress of an NIH roadmap cooperative group during its first two years. *Medical Care*, 2007;45:3-11.  
19  
20 18. Terwee CB, Roorda LD, De Vet HCW, et al. Dutch-Flemish translation of 17 item banks from the Patient-  
21 Reported Outcomes Measurement Information System (PROMIS). *Quality of Life Research*, 2014;23:1733-1741.  
22  
23 19. Cella D, Riley W, Stone A, et al. The Patient-Reported Outcomes Measurement Information System (PROMIS)  
24 developed and tested its first wave of adult self-reported health outcome item banks: 2005-2008. *Journal of Clinical*  
25 *Epidemiology*, 2010;63:1179-1194.  
26  
27 20. Hays RD, Bjorner JB, Revicki DA, Spritzer KL, and Cella D. Development of physical and mental health  
28 summary scores from the Patient-Reported Outcomes Measurement Information System (PROMIS) global items.  
29 *Quality of Life Research*, 2009;18:873-880.  
30  
31 21. Hays RD and Morales LS. The RAND-36 measure of health-related quality of life. *Annals of Medicine*,  
32 2001;33:350-357.  
33  
34 22. Field AP. *Discovering statistics using IBM SPSS Statistics (4th edition)*. SAGE, London, 2014.  
35  
36 23. Quach QW, Langer MM, Chen RC, et al. Reliability and validity of PROMIS measures administered by  
37 telephone interview in a longitudinal localized prostate cancer study. *Quality of Life Research*, 2016;25:2811-2823.  
38  
39 24. Magnus BE, Liu Y, He J, et al. Mode effects between computer self-administration and telephone interviewer-  
40 administration of the PROMIS pediatric measures, self- and proxy report. *Quality of Life Research*, 2016;25:1655-  
41 1665.  
42  
43  
44  
45  
46  
47  
48  
49  
50  
51  
52  
53  
54  
55  
56  
57  
58  
59  
60

1  
2  
3 25. Van Mierlo ML, Van Heugten CM, Post MW, Hajos TRS, Kappelle LJ, and Visser-Meily JMA. Quality of life  
4 during the first two years post stroke: the Restore4Stroke cohort study. *Cerebrovascular Diseases*, 2016;41:19-26.  
5  
6  
7  
8  
9  
10  
11  
12  
13  
14  
15  
16  
17  
18  
19  
20  
21  
22  
23  
24  
25  
26  
27  
28  
29  
30  
31  
32  
33  
34  
35  
36  
37  
38  
39  
40  
41  
42  
43  
44  
45  
46  
47  
48  
49  
50  
51  
52  
53  
54  
55  
56  
57  
58  
59  
60

For peer review only

A

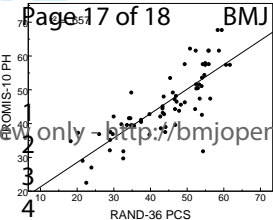

B

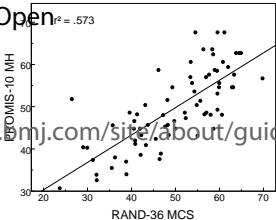

A

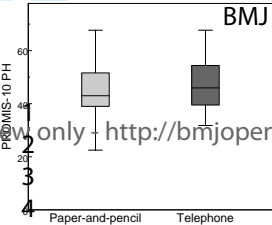

B

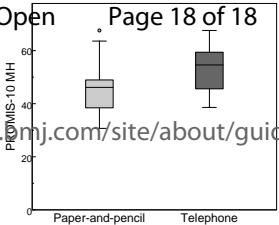

# BMJ Open

## Validity of the PROMIS-10 Global Health assessed by telephone and on paper in minor stroke and transient ischemic attack in the Netherlands

|                                 |                                                                                           |
|---------------------------------|-------------------------------------------------------------------------------------------|
| Journal:                        | <i>BMJ Open</i>                                                                           |
| Manuscript ID                   | bmjopen-2017-019919.R1                                                                    |
| Article Type:                   | Research                                                                                  |
| Date Submitted by the Author:   | 18-Apr-2018                                                                               |
| Complete List of Authors:       | Lam, Ka-Hoo; OLVG, Neurology<br>Kwa, Vincent; Onze Lieve Vrouwe Gasthuis, Neurology       |
| <b>Primary Subject Heading</b>: | Neurology                                                                                 |
| Secondary Subject Heading:      | Global health                                                                             |
| Keywords:                       | Stroke < NEUROLOGY, Transient ischemic attack, Quality of life, Patient-reported outcomes |
|                                 |                                                                                           |

SCHOLARONE™  
Manuscripts

Peer Review Only

**Title**

Validity of the PROMIS-10 Global Health assessed by telephone and on paper in minor stroke and transient ischemic attack in the Netherlands

**Running title**

PROMIS-10 in minor stroke and transient ischemic attack

**Authors**

1. Ka-Hoo Lam, MD, department of Neurology, OLVG Oost hospital, Oosterpark 9, 1091AC Amsterdam, the Netherlands. ORCID: 0000-0003-0926-1445.
2. Vincent I.H. Kwa, MD, PhD, department of Neurology, OLVG Oost hospital, Oosterpark 9, 1091AC Amsterdam, the Netherlands. ORCID: 0000-0002-0942-6206.

**Corresponding author**

Vincent I.H. Kwa

Telephone: +31205993044

Fax: +31205993845

E-mail: v.i.h.kwa@olvg.nl

## Abstract

*Objectives:* Dysfunction after transient ischemic attack (TIA) and minor stroke is often underestimated by clinical measures. Patient-reported outcome measures used in value-based healthcare may help detecting these problems. The PROMIS-10 Global Health is a concise patient-centered outcome measuring tool proposed for assessing health status in stroke patients. This study aims to address the validity of the Dutch PROMIS-10 in stroke patients in the Netherlands and also aims to compare telephone versus on-paper assessment.

*Design:* Observational cohort study.

*Setting:* Single-centre hospital in the Netherlands.

*Participants:* 75 patients who were diagnosed with TIA or minor stroke and discharged without rehabilitation treatment one year ago (between December 2014 and January 2016) completed the study.

### *Primary and secondary outcome measures*

PROMIS-10 physical and mental health scores assessed one year post-stroke on paper ( $n = 37$ ) and by telephone ( $n = 38$ ) was compared to RAND-36 physical and mental component scores assessed on paper.

*Results:* PROMIS-10 and RAND-36 correlated significantly in physical health,  $r = .81$ , 95% CI [.69, .88], and mental health,  $r = .76$ , 95% CI [.64, .85]. Paper-and-pencil assessed correlations were  $r = .87$  and  $.79$  for physical and mental health, respectively. Telephone assessed correlations were  $r = .76$  and  $.73$  for physical and mental health, respectively. Internal consistency analysis indicated high reliabilities for both health components of the PROMIS-10, all Cronbach's  $\alpha > .70$ .

*Conclusions:* The Dutch PROMIS-10 was found to strongly correlate with the RAND-36. Paper-and-pencil assessment was found to have a higher correlation than telephone assessment. This study provides support for the use of the Dutch PROMIS-10 in assessing health status in patients after TIA and minor stroke.

### **Strengths and limitations of this study**

- This is the first study that addresses the PROMIS-10 as measuring tool for health status in TIA and minor stroke patients in the Netherlands.
- Subjects were very similarly distributed in terms of clinical and socioeconomic factors between different comparator groups.
- Generalizability of the study results is reduced due to a relatively small sample size.

- There was a time window between assessment of paper-based RAND-36 and telephone-based PROMIS-10.
- PROMIS-10 was assessed at one time point only; this study provides no insight on test-retest reliability of the PROMIS-10.
- Additional potential confounding factors for self-reported quality of life such as individual personality traits, extent of social support, socio-economic status and ethnicity were not accounted for in this study.

**Keywords:** quality of life, patient-reported outcomes, stroke, transient ischemic attack

## Introduction

Following a stroke many patients experience persistent deficits and reduced functional independence [1], while full recovery is assumed in TIA and minor stroke patients who are discharged to home without further rehabilitation treatment [2]. However, previous studies in TIA and minor stroke patients found high prevalence of dysfunction across all domains of health, of which cognitive and emotional problems were most notable [3-6]. These symptoms may be overlooked with conventional clinical measures such as the neurological examination or the Barthel Index, but can be a major contributor to an impaired performance of activities of daily living and a diminished quality of life (QoL) [2,7-9]. This emphasizes the importance of patient-reported outcomes (PROs), which measure health status reported directly from the patient [10]. Measuring PROs is also an essential principal in the emerging value-based healthcare [11]. As such, health measurement is shifting from process measurement towards outcome measurement to improve quality while reducing costs [12]. This initiated the proposal of a Stroke Standard Set for measuring health in stroke by the International Consortium for Health Outcomes Measurement (ICHOM) [13]. The expert group recommends the Patient Reported Outcomes Measurement Information System 10-Question Short Form (PROMIS-10 Global Health) for assessing health status after stroke [14]. The PROMIS-10 has been translated into Dutch by the Dutch-Flemish PROMIS group (<http://www.dutchflemishpromis.nl>), but has not yet been validated or compared with existing validated instruments in stroke patients [15].

## *Aims*

This study aims to investigate the construct validity and reliability of the Dutch PROMIS-10 in TIA and minor stroke patients in the Netherlands. We also aim to evaluate different assessment methods of the PROMIS-10: on paper



(filled in by the patient) assessment versus assessment through the telephone. As telephone assessment might be more feasible in the population of stroke patients, which mainly consists of elderly patients.

## Methods

### *Study design*

This single-centre observational cohort study was part of a concurrent quality of life study at OLVG Oost hospital. Between January 2016 and January 2017 medical records of patients diagnosed with a TIA or minor stroke one year ago were screened for eligibility, as Mierlo et al. (2016) reported improvement of quality of life occurring the most in the first six months and up to one year after stroke [16]. Eligible patients were approached by telephone for study participation. Following verbal consent to study participation, study materials were sent by mail; study information, consent form, PROMIS-10, RAND-36 (a health-related quality of life measure), and a short form for obtaining socio-demographic data. PROMIS-10 was assessed on paper from January 1 to July 31, 2016 and by telephone from August 1, 2016 to January 31, 2017. On paper assessments of the PROMIS-10 and RAND-36 were completed by the patients at home on their own or with help of a proxy. Telephone assessments of the PROMIS-10 were carried out by reading out the exact questions and marking the given answers. Clinical data were extracted from medical records. Full ethical approval was given by the Medical Research Ethics Committees United (MEC-U), Nieuwegein. Informed consent was obtained from all individual participants included in the study. Clinical data (age, gender, diagnosis, stroke localization and incidence) of non-participating and excluded eligible patients were recorded in a non-identifiable manner without requiring consent.

### *Subjects*

Eligibility included a clinical diagnosis of TIA or minor stroke followed by discharge without inpatient rehabilitation treatment. MRI is not part of the standard diagnostic work-up of stroke but was performed whenever other causes than ischemia could not be ruled out. For this study TIA and minor stroke were defined as acute neurological deficits with symptoms of stroke on admission that fully resolves within 24 hours and three days, respectively.

As standard practice TIA and stroke patients discharged to home are re-evaluated shortly after discharge by a specialized stroke nurse. If during the re-evaluation residual or new symptoms are present or suspected, patients are referred to the Beroerte Adviescentrum (BAC, 'Stroke Advice Centre'), a central body that coordinates and

1  
2  
3 effectuates outpatient care for stroke patients. As the BAC measures baseline health status, which is an inclusion  
4 criterion for the concurrent QoL study, patients who were not referred to the BAC or did not complete baseline  
5 measurements were deemed ineligible.  
6  
7

8 Exclusion criteria were: age below 18 years, persistent neurological symptoms three days post-stroke,  
9 insufficient proficiency in Dutch, dementia or any behavioural disorder that may compromise study participation.  
10  
11  
12

### 13 14 *Measures*

15  
16 The PROMIS-10 is a 10-item measure for self-reported QoL, physical health, and mental health. It has been shown  
17 to be reliable, precise and comparable to legacy instruments [17]. Physical health (PH) and mental health (MH) T-  
18 scores can be calculated through an online scoring service provided by Assessment Center  
19 (www.assessmentcenter.net/ac\_scoring-service). The T-score distributions are standardized with mean (*SD*) of 50  
20 (10) for the United States' (US) general population, where higher scores indicate better outcome. In this study a  
21 Dutch version of the PROMIS-10 was used [15]. As standardized scores for the Netherlands are unavailable, T-  
22 scores were calculated using the US population standard scores.  
23  
24  
25  
26  
27  
28

29  
30 The RAND-36 (identical to the SF-36) is a widely used QoL measure, comprising of 36 items covering a  
31 wide range of health domains [18]. Two component scores can be derived: physical (PCS) and mental (MCS)  
32 component score. PCS and MCS are standardized with mean (*SD*) of 50 (10), with higher scores reflecting better  
33 outcome. The RAND-36 has been translated and validated into multiple languages, including Dutch [19]. In this  
34 study the Dutch RAND-36 version 2 was used. However, PCS and MCS were calculated using US-standardized  
35 weights for a more equal comparison to the PROMIS-10, which was calculated similarly.  
36  
37  
38  
39  
40

41 Socio-demographic data collected were: marital status, level of education (assessed on the Dutch 7-point  
42 scale 'schaal van Verhage', and afterwards stratified into three groups: low (primary school), average (secondary  
43 school low or medium level), and high (highest level secondary school, and/or college degree, and/or university  
44 degree) [20], living arrangement, and work status.  
45  
46  
47  
48  
49

### 50 51 *Data analysis*

52 Numerical variables were summarized by the mean  $\pm$  *SD*, and frequencies and percentages were used for binary and  
53 categorical variables. Differences in patient characteristics were assessed using the independent samples *t*-test and  $\chi^2$   
54  
55  
56  
57

1  
2  
3 test for continuous and categorical variables, respectively. For assessing construct validity, correlation between  
4 PROMIS-10 and RAND-36 was assessed by calculating Pearson's correlation coefficient ( $r$ ), with a bias corrected  
5 and accelerated bootstrapping (BCa) method providing 95% confidence intervals. Agreement between PROMIS-10  
6 and RAND-36 was assessed by constructing Bland-Altman plots with horizontal lines representing the mean  
7 difference and 95% limits of agreement (LOA) (mean difference  $\pm 1.96$  SD). An independent samples  $t$ -test was  
8 performed for assessing differences between assessment methods of the PROMIS-10. For the internal consistency of  
9 the PROMIS-10, reliability analysis was used to calculate Cronbach's  $\alpha$ s for both physical (4 items) and mental (4  
10 items) subscales. A cut-off point of  $\geq .70$  was chosen for indication of good reliability ( $\alpha$ ) and correlation ( $r$ ) [21]. A  
11  $p$ -value of  $< .05$  was considered to be statistically significant. All statistical analysis was performed using IBM SPSS  
12 version 22.

#### 13 14 15 16 17 18 19 20 21 22 23 24 *Patient and public involvement*

25 The development of the research question was based on earlier research on patients' experience of our care after a  
26 TIA or minor stroke. Many patients had hidden signs and symptoms that were not recognized by doctors at first  
27 sight. We are now developing 'Value-based healthcare' with help of patient related outcome measures like the one  
28 that is investigated in this study, to be able to detect these hidden signs and symptoms. In the informed consent form  
29 we stated that after the end of the study we will send a letter to the participants to inform them about the results of  
30 the study.

#### 31 32 33 34 35 36 37 38 39 40 41 **Results**

42 A total of 592 patients were identified who were diagnosed with a TIA or minor stroke one year prior to the  
43 assessment (from December 2014 to January 2016). Following re-evaluation by their physician, 301 patients were  
44 not referred to BAC for follow-up care, 26 patients originated from a different region or country, and 8 died before  
45 BAC follow-up. Of the remaining 257 eligible patients, 182 were non-respondents (108 had no baseline  
46 measurements, 12 were insufficient proficient in Dutch, 11 died before follow-up at one year post-stroke, 6 had  
47 dementia or a behavioural disorder, 28 refused participation, 13 were not responsive after initial consent, and 4 were  
48 not reachable by phone) and 75 patients were included for the study (see figure 1).

1  
2  
3  
4  
5 **Figure 1. Flow chart of the study population**

6 [insert figure 1.]  
7  
8  
9

10 Of the 75 included patients, mean age was  $68.9 \pm 11.2$  years, 51 (68.0%) were male, 60 (80.0%) had their  
11 first-ever ischemic event, 49 (65.3%) had the diagnosis minor stroke and 26 (34.7%) TIA. The ischemic event was  
12 located in the left hemisphere in 30 (40.0%) patients, 23 (30.7%) in the right hemisphere, and 22 (29.3%) were  
13 vertebrobasilar. There were no statistically significant differences between the study population and the non-  
14 respondents. Mean (*SD*) scores for the PROMIS-10 were 45.8 (9.9) for PH, and 49.6 (9.1) for MH. Scores for the  
15 RAND-36 were 43.7 (11.4) for PCS, and 49.9 (10.7) for MCS.  
16  
17

18 In 37 patients the PROMIS-10 and RAND-36 were assessed on paper; two had missing values in the  
19 physical total score, and one in both physical and mental total score of the PROMIS-10, another patient had missing  
20 values in both component scores of the RAND-36. These 37 patients formed the 'paper-and-pencil group'. 38  
21 patients completed the PROMIS-10 by telephone (and the RAND-36 on paper), these patients formed the 'telephone  
22 group'. Patient characteristics of both groups are summarized in table 1. No statistically significant differences were  
23 observed between the two groups.  
24  
25  
26  
27  
28  
29  
30  
31  
32  
33  
34  
35

36 **Table 1. Patient characteristics between the study population ( $n = 75$ , divided in 'paper-and-pencil' and 'telephone' group)**  
37 **and non-respondents ( $n = 182$ )**

| Characteristic                                       | Study population ( $n = 75$ )      |                             |                   | Non-respondents ( $n = 182$ ) | <i>p</i> -value   |
|------------------------------------------------------|------------------------------------|-----------------------------|-------------------|-------------------------------|-------------------|
|                                                      | 'Paper-and-pencil'<br>( $n = 37$ ) | 'Telephone'<br>( $n = 38$ ) | <i>p</i> -value   |                               |                   |
| Days between onset and follow-up, mean ( <i>SD</i> ) | 374.8 (59.7)                       | 375.7 (30.7)                |                   | n/a                           |                   |
| Age, y, mean ( <i>SD</i> )                           | 67.4 (9.9)                         | 70.4 (12.2)                 | .258 <sup>a</sup> | 68.5 (12.2)                   | .810 <sup>a</sup> |
| Gender                                               |                                    |                             | .160 <sup>b</sup> |                               | .053 <sup>b</sup> |
| Female                                               | 9 (24.3)                           | 15 (39.5)                   |                   | 82 (45.1)                     |                   |
| Male                                                 | 28 (75.7)                          | 23 (60.5)                   |                   | 100 (54.9)                    |                   |

|                         |           |           |                   |            |                   |
|-------------------------|-----------|-----------|-------------------|------------|-------------------|
| Diagnosis               |           |           | .170 <sup>b</sup> |            | .086 <sup>b</sup> |
| TIA                     | 10 (27.0) | 16 (42.1) |                   | 44 (24.2)  |                   |
| Minor stroke            | 27 (73.0) | 22 (57.9) |                   | 138 (75.8) |                   |
| Localization            |           |           | .921 <sup>b</sup> |            | .505 <sup>b</sup> |
| Right hemisphere        | 12 (32.4) | 11 (28.9) |                   | 51 (28.0)  |                   |
| Left hemisphere         | 14 (37.8) | 16 (42.1) |                   | 77 (42.3)  |                   |
| Vertebrobasilar         | 11 (29.7) | 11 (28.9) |                   | 47 (25.8)  |                   |
| Ocular                  | 0 (0.0)   | 0 (0.0)   |                   | 3 (1.6)    |                   |
| Other/unknown           | 0 (0.0)   | 0 (0.0)   |                   | 4 (2.2)    |                   |
| Stroke incidence        |           |           | .729 <sup>b</sup> |            | .469 <sup>b</sup> |
| First ever              | 29 (78.4) | 31 (81.6) |                   | 138 (75.8) |                   |
| Relapse                 | 8 (21.6)  | 7 (18.4)  |                   | 44 (24.2)  |                   |
| Marital status          |           |           | .988 <sup>b</sup> |            |                   |
| Married                 | 22 (59.5) | 22 (57.9) |                   | n/a        |                   |
| Unmarried               | 13 (35.1) | 14 (36.8) |                   | n/a        |                   |
| Widowed                 | 2 (5.4)   | 2 (5.3)   |                   | n/a        |                   |
| Education               |           |           | .561 <sup>b</sup> |            |                   |
| Low                     | 5 (13.9)  | 3 (7.9)   |                   | n/a        |                   |
| Average                 | 16 (44.4) | 21 (55.3) |                   | n/a        |                   |
| High                    | 15 (41.7) | 14 (36.8) |                   | n/a        |                   |
| Living arrangement      |           |           | .925 <sup>b</sup> |            |                   |
| Alone                   | 15 (40.5) | 15 (39.5) |                   | n/a        |                   |
| With spouse/relative(s) | 22 (59.5) | 23 (60.5) |                   | n/a        |                   |
| Current work status     |           |           | .969 <sup>b</sup> |            |                   |
| Back to work            | 8 (21.6)  | 8 (21.1)  |                   | n/a        |                   |
| Not (fully) back        | 6 (16.2)  | 7 (18.4)  |                   | n/a        |                   |

|         |           |           |  |     |  |
|---------|-----------|-----------|--|-----|--|
| to work |           |           |  |     |  |
| Retired | 23 (62.2) | 23 (60.5) |  | n/a |  |

**Abbreviations:** TIA = transient ischemic attack, n/a = not available. All data are expressed as n (%), except where specified. <sup>a</sup> t-test; <sup>b</sup>  $\chi^2$  test..

### *Construct validity*

PROMIS-10 and RAND-36 physical and mental scores correlated significantly,  $r = .81$ , BCa CI [.69, .88],  $p < .001$ , and  $r = .76$ , BCa CI [.64, .85],  $p < .001$ , respectively (see figure 2). Figure 3 shows the Bland-Altman plots for PROMIS-10 and RAND-36 physical and mental health. The continuous line represents the mean difference and the dotted lines represent the 95% levels of agreement between both measures.

**Figure 2.** Scatterplots of PROMIS-10 and RAND-36 physical (A) and mental health scores (B).

[Insert Figure 2.]

**Figure 3.** Bland-Altman plots of PROMIS-10 and RAND-36 physical (A) and mental health scores (B).

[Insert Figure 3.]

When scores for the PROMIS-10 PH and MH were divided between 'paper-and-pencil' and 'telephone' groups, correlation between the PROMIS-10 and RAND-36 physical and mental health increased in the 'paper-and-pencil' group and decreased in the 'telephone' group. The results are summarized in table 2. Mean PH score was lower in the 'paper-and-pencil' group than in the 'telephone' group. This difference was not statistically significant. The mean MH score was also lower in the 'paper-and-pencil' group than in the 'telephone' group. This difference however, was statistically significant. Mean scores of the RAND-36 PCS and MCS were not statistically significantly different among the two groups based on assessment method of PROMIS-10. The results are summarized in table 3.

**Table 2. Bivariate correlations between PROMIS-10 and RAND-36**

|                              | RAND-36            |                    | <i>n</i> |
|------------------------------|--------------------|--------------------|----------|
|                              | PCS                | MCS                |          |
| PROMIS-10                    |                    |                    |          |
| PH                           | .82*<br>[.70, .90] | —                  | 71       |
| MH                           | —                  | .70*<br>[.57, .82] | 73       |
| PROMIS-10 (paper-and-pencil) |                    |                    |          |
| PH                           | .88*<br>[.78, .90] | —                  | 33       |
| MH                           | —                  | .70*<br>[.54, .84] | 35       |
| PROMIS-10 (telephone)        |                    |                    |          |
| PH                           | .77*<br>[.54, .91] | —                  | 38       |
| MH                           | —                  | .70*<br>[.50, .86] | 38       |

\* $p < .01$ . BCa bootstrap 95% CIs reported in brackets. Abbreviations: PCS = physical component score, MCS = mental component score, PH = physical health, MH = mental health.

**Table 3. Independent samples t-tests comparing PROMIS-10 and RAND-36, between 'paper-and-pencil' and 'telephone' group**

|              | 'Paper-and-pencil' |          | 'Telephone'        |          | 95% CI for mean difference | <i>t</i> -value (df) | <i>p</i> -value |
|--------------|--------------------|----------|--------------------|----------|----------------------------|----------------------|-----------------|
|              | Mean ( <i>SD</i> ) | <i>n</i> | Mean ( <i>SD</i> ) | <i>n</i> |                            |                      |                 |
| PROMIS-10 PH | 44.1 (10.1)        | 34       | 47.2 (9.5)         | 38       | -7.67, 1.57                | -1.32 (70)           | .192            |

|              |             |    |             |    |               |            |      |
|--------------|-------------|----|-------------|----|---------------|------------|------|
| PROMIS-10 MH | 45.6 (8.5)  | 36 | 53.4 (8.0)  | 38 | -11.57, -3.90 | -4.02 (72) | .001 |
| RAND-36 PCS  | 48.7 (12.2) | 36 | 51.0 (11.8) | 38 | -7.86, 3.27   | -0.82 (72) | .414 |
| RAND-36 MCS  | 34.7 (8.4)  | 36 | 37.7 (7.6)  | 38 | -6.64, 0.80   | -1.56 (72) | .122 |

**Abbreviations: PH = physical health, MH = mental health, PCS = physical component score, MCS = mental component score.**

### *Internal consistency*

The PROMIS-10 demonstrated high reliabilities for both PH, Cronbach's  $\alpha = .79$ , and MH, Cronbach's  $\alpha = .83$ .

Similar  $\alpha$ s were observed for the PROMIS-10 assessed by paper-and-pencil and telephone:  $\alpha = .82$  and  $.81$  for PH and MH, respectively, in the 'paper-and-pencil' group;  $\alpha = .77$  and  $.80$  for PH and MH, respectively, in the 'telephone' group.

### **Discussion**

In this study we used the Dutch PROMIS-10 to assess QoL in patients at one year after TIA or minor stroke. Our results indicate an overall strong correlation between the PROMIS-10 and the RAND-36. QoL attributed to physical health was found to have a higher correlation than QoL attributed to mental health. This could be explained due to physical health tending to be more objective and less multidimensional in nature. Whereas mental health is generally more subjective and an exact cause is less easy to pinpoint, which makes mental health more prone to recall bias. Additionally, physical health tends to be more consistent over time, while mental health is more prone to fluctuations. As PROMIS-10 and RAND-36 measures self-reported health over a period in time, timing of assessment is more likely to affect mental health than physical health. Nonetheless, both correlations were within the range considered to be moderate to high. Visual inspection of Bland-Altman plots between PROMIS-10 and RAND-36 physical and mental health revealed no obvious trend or inconsistent variability.

Subsequently, we compared two assessment methods of the PROMIS-10. Both physical and mental health assessed by telephone, although slightly inferior to on-paper assessment, was found to have a strong correlation with on-paper assessed RAND-36. No studies were found that addressed the validity of telephone assessment of the PROMIS-10. Two studies however, evaluated telephone assessment of other PROMIS measures [22,23]. In line with our results, both studies provide support for telephone assessment. One of the studies compared telephone to self-administered assessment; aside from small mode effects most likely related to study design, no



1  
2  
3 apparent differences were reported as was found in our study [23]. In our study we suspect that lack of visual support  
4  
5 when choosing a score within a range might have been contributing to a lower correlation. Other noted caveats in  
6  
7 telephone assessment in our study were hesitation, choosing scores in between, and the tendency to substantiate  
8  
9 choices during assessment.

10  
11 When comparing PROMIS-10 and RAND-36 scores between the 'paper-and-pencil' and 'telephone'  
12  
13 group, it is notable that scores of the on paper assessed RAND-36 were similar in both physical and mental health,  
14  
15 whereas PROMIS-10 scores were significantly higher (i.e. better) in the 'telephone' group compared to the 'paper-  
16  
17 and-pencil' group. We speculate that patients could be inclined to appear better, answer more socially desirable, and  
18  
19 are less inclined to open up about mental problems in a direct telephone interview as opposed to on-paper  
20  
21 assessment. This speculation can be supported by findings by Perkins et al. (1998) and Erhart et al. (2009), who  
22  
23 reported statistical significant differences for mental health components in favour of telephone assessment, compared  
24  
25 to self-administration by mail [24,25].

26  
27 Gender could be another possible contributing factor for the observed difference in mental health in our  
28  
29 two groups; although not significant, there were slightly more women in our 'telephone' group compared to the  
30  
31 'paper-and-pencil' group. However, mental health was found to be similar when comparing gender. In addition, Muus  
32  
33 et al. (2010), who studied a similar population, reported that women tend to have ischemic stroke at a higher age and  
34  
35 have more severe strokes compared to men [4]. Rather, an opposite result (i.e. higher scores in the 'telephone' group,  
36  
37 compared to 'paper-and-pencil' group) would then be expected in our study. The difference in mental health between  
38  
39 our 'telephone' and 'paper-and-pencil' group is therefore not likely to be attributable to gender.

40  
41 Other possible causes of the difference between our PROMIS-10 'telephone' and 'paper-and-pencil'  
42  
43 group could be that the former group comprises of healthier patients. Although not significant, our 'telephone' group  
44  
45 comprised of slightly more TIA patients, who are expected to have better outcomes than minor stroke patients.  
46  
47 However, when taking diagnosis into account, physical and mental scores between the two groups did not  
48  
49 significantly differ for both PROMIS-10 and RAND-36. The remaining patient characteristics obtained in this study  
50  
51 were nearly identically distributed among both groups and are therefore unlikely to have confounded the results.

### 52 53 *Limitations*

1  
2  
3 The generalizability of our results is reduced due to our small sample size. Moreover, our study population does not  
4 cover the full range of stroke patients. Aside from exclusion of major stroke, as our target population were TIA and  
5 minor stroke patients, a large number of patients were not included as referral to the BAC based on symptoms was  
6 not indicated. Nonetheless, these relatively mildly affected patients still represent part of our target population. The  
7 same applies to patients who were excluded due to an insufficient proficiency in Dutch. In contrast to  
8 generalizability, these limitations should barely affect our results, as patient characteristics were similar among the  
9 included patients and the non-respondents.  
10  
11  
12  
13  
14  
15

16 Noteworthy is the mean (*SD*) of 12.5 (7.6) days between assessment of RAND-36 on paper and  
17 assessment of PROMIS-10 by telephone in our 'telephone' group. On the other hand, on paper assessment of the  
18 PROMIS-10 is (assumed to be) completed on the same day. Health status might change over these few days.  
19 Moreover, three items of PROMIS-10 are concerned with the past seven days (fatigue, emotional problems, and  
20 pain).  
21  
22  
23  
24  
25

26 Timing of measurement of health status in stroke should also be taken into account. We assessed the  
27 PROMIS-10 at one year post-stroke, in contrast to the 3 months post-stroke proposed by the ICHOM consensus  
28 group [13]. In our current study one year post-stroke was chosen based on the results of Mierlo et al. (2016), who  
29 reported improvement of quality of life occurring up to one year after stroke, with most changes occurring within the  
30 first six months [16]. Another limitation is that there is no information regarding test-retest reliability of PROMIS-10  
31 as is was only assessed at one time point.  
32  
33  
34  
35  
36

37 Lastly, possible confounding factors such as individual personality traits, extent of social support, socio-  
38 economic status and ethnicity was not accounted for in this study, while these factors undoubtedly impact self-  
39 reported quality of life.  
40  
41  
42  
43  
44

#### 45 *Conclusions*

46  
47 This study provides support for the use of the Dutch version of the PROMIS-10 in patients after minor stroke or TIA  
48 in the Netherlands. Despite satisfactory validity of telephone assessment, careful interpretation is advised, especially  
49 when addressing mental health status. Additional data and further research with the PROMIS-10 in stroke patients is  
50 desirable for establishing more firm results.  
51  
52  
53  
54  
55  
56  
57  
58  
59  
60

### Contributorship statement

K.H. Lam and V.I.H. Kwa state that the following criteria for contributorship, in accordance to the ICMJE criteria for authorship, are met:

- Substantial contributions to the conception or design of the work; or the acquisition, analysis, or interpretation of data for the work; AND
- Drafting the work or revising it critically for important intellectual content; AND
- Final approval of the version to be published; AND
- Agreement to be accountable for all aspects of the work in ensuring that questions related to the accuracy or integrity of any part of the work are appropriately investigated and resolved.

In addition to being accountable for the parts of the work the authors have done, all authors are able to identify which co-authors are responsible for specific other parts of the work. In addition, the authors have confidence in the integrity of the contributions of our co-authors.

### Acknowledgements

The authors would like to thank all patients that have participated in the study, M. Lagerwaard for data collection, the BAC-team: I. Bekker, J. Kramer, and B. Notz, for their continuous efforts in providing care for stroke patients, C. Terwee for technical support with the PROMIS-10, and D. van Rooijen for providing support in statistical analysis.

### Competing interests

The authors declare that they have no competing interests.

### Funding statement

This research is funded by the Foundation Teaching Hospital OLVG, Amsterdam.

### Data sharing statement

Individual participant data collected during the study that underlie the results reported in the manuscript, after deidentification (text, tables and figures), will be available for data sharing. The data will be available immediately

1  
2  
3  
4  
5  
6  
7  
8  
9  
10  
11  
12  
13  
14  
15  
16  
17  
18  
19  
20  
21  
22  
23  
24  
25  
26  
27  
28  
29  
30  
31  
32  
33  
34  
35  
36  
37  
38  
39  
40  
41  
42  
43  
44  
45  
46  
47  
48  
49  
50  
51  
52  
53  
54  
55  
56  
57  
58  
59  
60

after publication and ends 36 months after publication. The data will be available to investigators whose proposed use of the data has been approved by an independent review committee. Up to 36 months after publication, the data can be requested and accessed electronically.

For peer review only

## References

1. Winstein CJ, Stein J, Arena R, et al. Guidelines for adult stroke rehabilitation and recovery: a guideline for healthcare professionals from the American Heart Association/American Stroke Association. *Stroke*, 2016;47:98-169.
2. Edwards DF, Hahn M, Baum C, and Dromerick AW. The impact of mild stroke on meaningful activity and life satisfactions. *Journal of Stroke and Cerebrovascular Diseases*, 2006;15:151-157.
3. Arts MLJ, Kwa VIH, and Dahmen R. High satisfaction with an individualised stroke care programme after hospitalization of patients with a TIA or minor stroke: a pilot study. *Cerebrovascular Diseases*, 2008;25:566-571.
4. Muus I, Petzold M, and Ringsberg KC. Health-related quality of life among Danish patients 3 and 12 months after TIA or mild stroke. *Scandinavian Journal of Caring Sciences*, 2010;24:211-218.
5. Radman N, Staub F, Aboulafia-Brakha A, Bogousslavsky J, and Annoni JM. Poststroke fatigue following minor infarcts: a prospective study. *Neurology*, 2012;79:1422-1427.
6. Moran GM, Fletcher B, Feltham MG, Calvert M, Sackley C, and Marshall T. Fatigue, psychological and cognitive impairment following transient ischaemic attack and minor stroke: a systematic review. *European Journal of Neurology*, 2014;21:1258-1267.
7. Duncan PW, Samsa GP, Weinberger M, et al. Health status of individuals with mild stroke. *Stroke*, 1997;28:740-745.
8. Suenkeler IH, Nowak M, Misselwitz B, et al. Timecourse of health-related quality of life as determined 3, 6 and 12 months after stroke: relationship to neurological deficit, disability and depression. *Journal of Neurology*, 2002;249:1160-1167.
9. Verbraak ME, Hoeksma AF, Lindeboom R, and Kwa VIH. Subtle problems in activities of daily living after a Transient Ischemic Attack or an apparently fully recovered non-disabling stroke. *Journal of Stroke and Cerebrovascular Diseases*, 2012;21:124-130.
10. Higgins JPT and Greene S. Cochrane handbook for systematic reviews of interventions version 5.1.0. <http://handbook.cochrane.org> (updated March 2011).
11. Porter ME. Value-based health care delivery. *Annals of Surgery*, 2008;248:503-509.
12. Porter ME. What is value in health care? *New England Journal of Medicine*, 2010;363:2477-2481.

13. Salinas J, Sprinkhuizen SM, Ackerson T, et al. An international standard set of patient-centered outcome measures after stroke. *Stroke*, 2016;47:180-186.
14. Cella D, Yount S, Rothrock N, et al. The Patient-Reported Outcomes Measurement Information System (PROMIS): Progress of an NIH roadmap cooperative group during its first two years. *Medical Care*, 2007;45:3-11.
15. Terwee CB, Roorda LD, De Vet HCW, et al. Dutch-Flemish translation of 17-item banks from the Patient-Reported Outcomes Measurement Information System (PROMIS). *Quality of Life Research*, 2014;23:1733-1741.
16. Van Mierlo ML, Van Heugten CM, Post MW, Hajos TRS, Kappelle LJ, and Visser-Meily JMA. Quality of life during the first two years post stroke: the Restore4Stroke cohort study. *Cerebrovascular Diseases*, 2016;41:19-26.
17. Cella D, Riley W, Stone A, et al. The Patient-Reported Outcomes Measurement Information System (PROMIS) developed and tested its first wave of adult self-reported health outcome item banks: 2005-2008. *Journal of Clinical Epidemiology*, 2010;63:1179-1194.
18. Hays RD, Bjorner JB, Revicki DA, Spritzer KL, and Cella D. Development of physical and mental health summary scores from the Patient-Reported Outcomes Measurement Information System (PROMIS) global items. *Quality of Life Research*, 2009;18:873-880.
19. Hays RD and Morales LS. The RAND-36 measure of health-related quality of life. *Annals of Medicine*, 2001;33:350-357.
20. Verhage F. Intelligence and age (in Dutch). Assen: Van Gorcum; 1964.
21. Field AP. *Discovering statistics using IBM SPSS Statistics (4th edition)*. SAGE, London, 2014.
22. Quach QW, Langer MM, Chen RC, et al. Reliability and validity of PROMIS measures administered by telephone interview in a longitudinal localized prostate cancer study. *Quality of Life Research*, 2016;25:2811-2823.
23. Magnus BE, Liu Y, He J, et al. Mode effects between computer self-administration and telephone interviewer-administration of the PROMIS pediatric measures, self- and proxy report. *Quality of Life Research*, 2016;25:1655-1665.
24. Perkins JJ and Sanson-Fisher RW. An examination of self- and telephone-administered modes of administration for the Australian SF-36. *Journal of Clinical Epidemiology*, 1998;51:969-973.
25. Erhart M, Wetzel RM, Krügel A, and Ravens-Sieberer U. Effects of phone versus mail survey methods on the measurement of health-related quality of life and emotional and behavioural problems in adolescents. *BMC Public Health*, 2009;491.

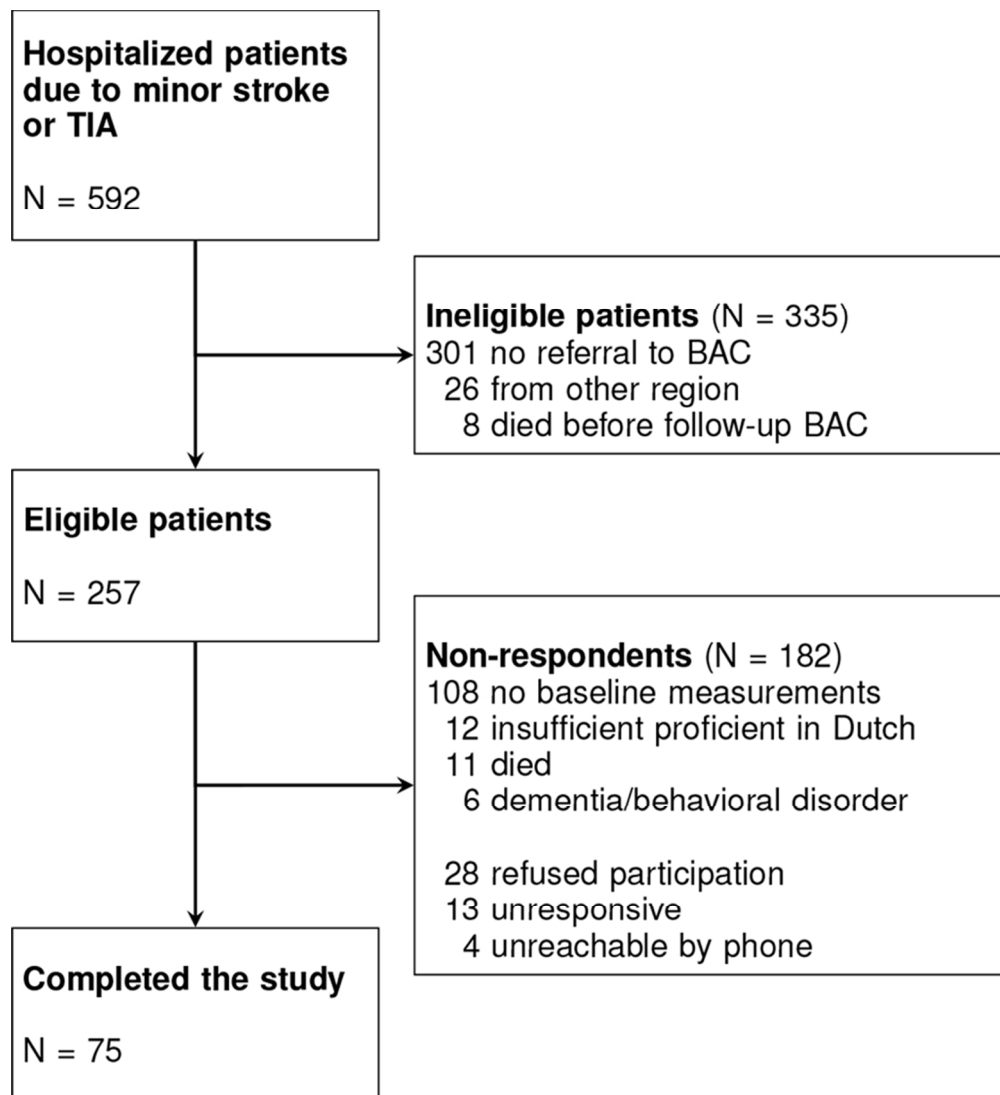

Figure 1. Flow chart of the study population

90x98mm (300 x 300 DPI)

1  
2  
3  
4  
5  
6  
7  
8  
9  
10  
11  
12  
13  
14  
15  
16  
17  
18  
19  
20  
21  
22  
23  
24  
25  
26  
27  
28  
29  
30  
31  
32  
33  
34  
35  
36  
37  
38  
39  
40  
41  
42  
43  
44  
45  
46  
47  
48  
49  
50  
51  
52  
53  
54  
55  
56  
57  
58  
59  
60

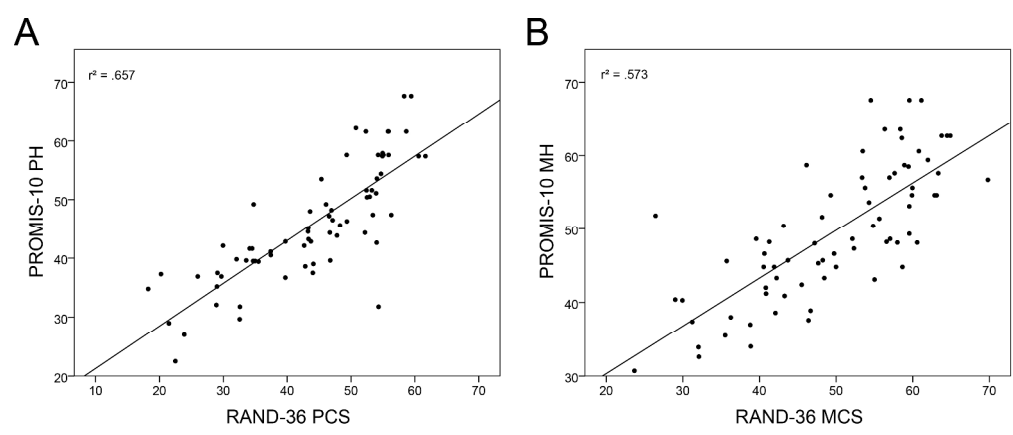

Figure 2. Scatterplots of PROMIS-10 and RAND-36 physical (A) and mental health scores (B).

337x141mm (300 x 300 DPI)

Peer review only



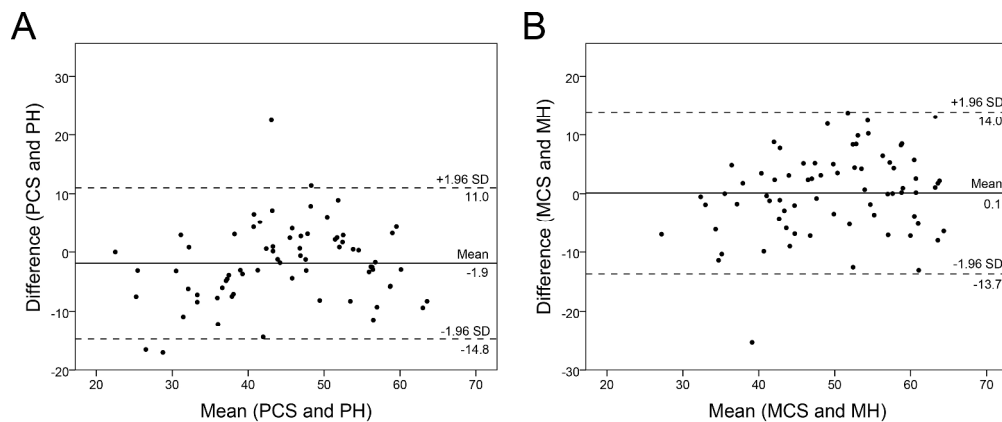

Figure 3. Bland-Altman plots of PROMIS-10 and RAND-36 physical (A) and mental health scores (B).

337x141mm (300 x 300 DPI)

Peer review only

STROBE Statement—checklist of items that should be included in reports of observational studies

|                           | <b>Item No.</b> | <b>Recommendation</b>                                                                               | <b>Page No.</b> | <b>Relevant text from manuscript</b>                                                                                                                                                                                                                                                                                                                                       |
|---------------------------|-----------------|-----------------------------------------------------------------------------------------------------|-----------------|----------------------------------------------------------------------------------------------------------------------------------------------------------------------------------------------------------------------------------------------------------------------------------------------------------------------------------------------------------------------------|
| <b>Title and abstract</b> | 1               | (a) Indicate the study’s design with a commonly used term in the title or the abstract              | 2               | “Design: Observational cohort study.”                                                                                                                                                                                                                                                                                                                                      |
|                           |                 | (b) Provide in the abstract an informative and balanced summary of what was done and what was found | 2               | “PROMIS-10 was found to strongly correlate with the RAND-36. Paper-and-pencil assessment was found to have a higher correlation than telephone assessment. This study provides support for the use of the Dutch PROMIS-10 in assessing health status in patients after TIA and minor stroke.”                                                                              |
| <b>Introduction</b>       |                 |                                                                                                     |                 |                                                                                                                                                                                                                                                                                                                                                                            |
| Background/rationale      | 2               | Explain the scientific background and rationale for the investigation being reported                |                 | “... previous studies in TIA and minor stroke patients found high prevalence of dysfunction across all domains of health, of which cognitive and emotional problems were most notable [3-6]. These symptoms may be overlooked with conventional clinical measures such as the neurological examination or the Barthel Index, but can be a major contributor to an impaired |

|                |   |                                                                                                                                 |   |                                                                                                                                                                                                                                                                                                                                                                                                                         |
|----------------|---|---------------------------------------------------------------------------------------------------------------------------------|---|-------------------------------------------------------------------------------------------------------------------------------------------------------------------------------------------------------------------------------------------------------------------------------------------------------------------------------------------------------------------------------------------------------------------------|
|                |   |                                                                                                                                 |   | performance of activities of daily living and a diminished quality of life (QoL)”                                                                                                                                                                                                                                                                                                                                       |
| Objectives     | 3 | State specific objectives, including any prespecified hypotheses                                                                | 4 | “... to investigate the construct validity and reliability of the Dutch PROMIS-10 in TIA and minor stroke patients in the Netherlands. We also aim to evaluate different assessment methods of the PROMIS-10: on paper (filled in by the patient) assessment versus assessment through the telephone.”                                                                                                                  |
| <b>Methods</b> |   |                                                                                                                                 |   |                                                                                                                                                                                                                                                                                                                                                                                                                         |
| Study design   | 4 | Present key elements of study design early in the paper                                                                         | 4 | “... single-centre observational cohort study ...”                                                                                                                                                                                                                                                                                                                                                                      |
| Setting        | 5 | Describe the setting, locations, and relevant dates, including periods of recruitment, exposure, follow-up, and data collection | 4 | “... at OLVG Oost hospital. Between January 2016 and January 2017 medical records of patients diagnosed with a TIA or minor stroke one year ago were screened for eligibility ...”<br><br>“Eligible patients were approached by telephone for study participation. (...) study materials were sent by mail; study information, consent form, PROMIS-10, RAND-36 (...), and a short form for obtaining socio-demographic |

1  
2  
3  
4  
5  
6  
7  
8  
9  
10  
11  
12  
13  
14  
15  
16  
17  
18  
19  
20  
21  
22  
23  
24  
25  
26  
27  
28  
29  
30  
31  
32  
33  
34  
35  
36  
37  
38  
39  
40  
41  
42  
43  
44  
45  
46  
47

|              |   |                                                                                                                                                                                                                                                                                                                                                                                                                                                                                    |   |                                                                                                                                                                                                                                                                                                                                                                                                                                                                                           |
|--------------|---|------------------------------------------------------------------------------------------------------------------------------------------------------------------------------------------------------------------------------------------------------------------------------------------------------------------------------------------------------------------------------------------------------------------------------------------------------------------------------------|---|-------------------------------------------------------------------------------------------------------------------------------------------------------------------------------------------------------------------------------------------------------------------------------------------------------------------------------------------------------------------------------------------------------------------------------------------------------------------------------------------|
|              |   |                                                                                                                                                                                                                                                                                                                                                                                                                                                                                    |   | data. PROMIS-10 was assessed on paper from January 1 to July 31, 2016 and by telephone from August 1, 2016 to January 31, 2017. On paper assessments of the PROMIS-10 and RAND-36 were completed by the patients at home on their own or with help of a proxy. Telephone assessments of the PROMIS-10 were carried out by reading out the exact questions and marking the given answers. Clinical data were extracted from medical records.”                                              |
| Participants | 6 | <p>(a) <i>Cohort study</i>—Give the eligibility criteria, and the sources and methods of selection of participants. Describe methods of follow-up</p> <p><i>Case-control study</i>—Give the eligibility criteria, and the sources and methods of case ascertainment and control selection. Give the rationale for the choice of cases and controls</p> <p><i>Cross-sectional study</i>—Give the eligibility criteria, and the sources and methods of selection of participants</p> | 4 | <p>“Eligibility included a clinical diagnosis of TIA or minor stroke followed by discharge without inpatient rehabilitation treatment. (...) TIA and minor stroke were defined as (...) symptoms of stroke on admission that fully resolves within 24 hours and three days, respectively.”</p> <p>“Exclusion criteria were: age below 18 years, persistent neurological symptoms three days post-stroke, insufficient proficiency in Dutch, dementia or any behavioural disorder ...”</p> |

|           |   |                                                                                                                                             |      |                                                                                                                                                                                                                                                                                                                                                                                                                                                                                                                                                                                                                                                                                                                                                                          |
|-----------|---|---------------------------------------------------------------------------------------------------------------------------------------------|------|--------------------------------------------------------------------------------------------------------------------------------------------------------------------------------------------------------------------------------------------------------------------------------------------------------------------------------------------------------------------------------------------------------------------------------------------------------------------------------------------------------------------------------------------------------------------------------------------------------------------------------------------------------------------------------------------------------------------------------------------------------------------------|
|           |   | (b) <i>Cohort study</i> —For matched studies, give matching criteria and number of exposed and unexposed                                    | n/a  | n/a                                                                                                                                                                                                                                                                                                                                                                                                                                                                                                                                                                                                                                                                                                                                                                      |
|           |   | <i>Case-control study</i> —For matched studies, give matching criteria and the number of controls per case                                  |      |                                                                                                                                                                                                                                                                                                                                                                                                                                                                                                                                                                                                                                                                                                                                                                          |
| Variables | 7 | Clearly define all outcomes, exposures, predictors, potential confounders, and effect modifiers.<br>Give diagnostic criteria, if applicable | 4, 5 | <p>“PROMIS-10 (...) Physical health (PH) and mental health (MH) T-scores”</p> <p>“RAND-36 (...) physical (PCS) and mental (MCS) component score.”</p> <p>“marital status, level of education ( (...) low (primary school), average (secondary school low or medium level), and high (highest level secondary school, and/or college degree, and/or university degree) [20], living arrangement, and work status.”</p> <p>“... clinical diagnosis of TIA or minor stroke followed by discharge without inpatient rehabilitation treatment. MRI is not part of the standard diagnostic work-up of stroke but was performed whenever other causes than ischemia could not be ruled out. For this study TIA and minor stroke were defined as acute neurological deficits</p> |

1  
2  
3  
4  
5  
6  
7  
8  
9  
10  
11  
12  
13  
14  
15  
16  
17  
18  
19  
20  
21  
22  
23  
24  
25  
26  
27  
28  
29  
30  
31  
32  
33  
34  
35  
36  
37  
38  
39  
40  
41  
42  
43  
44  
45  
46  
47

For peer review only

|                              |    |                                                                                                                                                                                      |      |                                                                                                                                                                                                                                                                                                                                                                                                                                                    |
|------------------------------|----|--------------------------------------------------------------------------------------------------------------------------------------------------------------------------------------|------|----------------------------------------------------------------------------------------------------------------------------------------------------------------------------------------------------------------------------------------------------------------------------------------------------------------------------------------------------------------------------------------------------------------------------------------------------|
|                              |    |                                                                                                                                                                                      |      | with symptoms of stroke on admission that fully resolves within 24 hours and three days, respectively.”                                                                                                                                                                                                                                                                                                                                            |
| Data sources/<br>measurement | 8* | For each variable of interest, give sources of data and details of methods of assessment (measurement). Describe comparability of assessment methods if there is more than one group | 4    | “Clinical data were extracted from medical records.”<br><br>“On paper assessments of the PROMIS-10 and RAND-36 were completed by the patients at home on their own or with help of a proxy. Telephone assessments of the PROMIS-10 were carried out by reading out the exact questions and marking the given answers.”                                                                                                                             |
| Bias                         | 9  | Describe any efforts to address potential sources of bias                                                                                                                            | 4, 5 | “Between January 2016 and January 2017 medical records of patients diagnosed with a TIA or minor stroke one year ago were screened for eligibility”<br><br>“Eligibility included a clinical diagnosis of TIA or minor stroke followed by discharge without inpatient rehabilitation treatment. (...) TIA and minor stroke were defined as (...) symptoms of stroke on admission that fully resolves within 24 hours and three days, respectively.” |

1  
2  
3  
4  
5  
6  
7  
8  
9  
10  
11  
12  
13  
14  
15  
16  
17  
18  
19  
20  
21  
22  
23  
24  
25  
26  
27  
28  
29  
30  
31  
32  
33  
34  
35  
36  
37  
38  
39  
40  
41  
42  
43  
44  
45  
46  
47

For peer review only

“If during the re-evaluation residual or new symptoms are present or suspected, patients are referred to the Beroerte Adviescentrum (...) patients who were not referred to the BAC or did not complete baseline measurements were deemed ineligible.”

“On paper assessments of the PROMIS-10 and RAND-36 were completed by the patients at home on their own or with help of a proxy. Telephone assessments of the PROMIS-10 were carried out by reading out the exact questions and marking the given answers. Clinical data were extracted from medical records.”

“Socio-demographic data collected were: marital status, level of education (...), living arrangement, and work status.”

---

|            |    |                                           |   |                                                                                                                                                     |
|------------|----|-------------------------------------------|---|-----------------------------------------------------------------------------------------------------------------------------------------------------|
| Study size | 10 | Explain how the study size was arrived at | 4 | “Between January 2016 and January 2017 medical records of patients diagnosed with a TIA or minor stroke one year ago were screened for eligibility” |
|------------|----|-------------------------------------------|---|-----------------------------------------------------------------------------------------------------------------------------------------------------|

---

1  
2  
3  
4  
5  
6  
7  
8  
9  
10  
11  
12  
13  
14  
15  
16  
17  
18  
19  
20  
21  
22  
23  
24  
25  
26  
27  
28  
29  
30  
31  
32  
33  
34  
35  
36  
37  
38  
39  
40  
41  
42  
43  
44  
45  
46  
47

Continued on next page

For peer review only



|    |                        |    |                                                                                                                              |      |                                                                                                                                                                                                                                                                                                                                                                                                                                                                                                                                                                                                                                                                                                                                                                                                   |
|----|------------------------|----|------------------------------------------------------------------------------------------------------------------------------|------|---------------------------------------------------------------------------------------------------------------------------------------------------------------------------------------------------------------------------------------------------------------------------------------------------------------------------------------------------------------------------------------------------------------------------------------------------------------------------------------------------------------------------------------------------------------------------------------------------------------------------------------------------------------------------------------------------------------------------------------------------------------------------------------------------|
| 1  |                        |    |                                                                                                                              |      |                                                                                                                                                                                                                                                                                                                                                                                                                                                                                                                                                                                                                                                                                                                                                                                                   |
| 2  |                        |    |                                                                                                                              |      |                                                                                                                                                                                                                                                                                                                                                                                                                                                                                                                                                                                                                                                                                                                                                                                                   |
| 3  |                        |    |                                                                                                                              |      |                                                                                                                                                                                                                                                                                                                                                                                                                                                                                                                                                                                                                                                                                                                                                                                                   |
| 4  | Quantitative variables | 11 | Explain how quantitative variables were handled in the analyses. If applicable, describe which groupings were chosen and why | 5    | “Numerical variables were summarized by the mean $\pm$ SD, and frequencies and percentages were used for binary and categorical variables.”                                                                                                                                                                                                                                                                                                                                                                                                                                                                                                                                                                                                                                                       |
| 5  |                        |    |                                                                                                                              |      |                                                                                                                                                                                                                                                                                                                                                                                                                                                                                                                                                                                                                                                                                                                                                                                                   |
| 6  |                        |    |                                                                                                                              |      |                                                                                                                                                                                                                                                                                                                                                                                                                                                                                                                                                                                                                                                                                                                                                                                                   |
| 7  |                        |    |                                                                                                                              |      |                                                                                                                                                                                                                                                                                                                                                                                                                                                                                                                                                                                                                                                                                                                                                                                                   |
| 8  |                        |    |                                                                                                                              |      |                                                                                                                                                                                                                                                                                                                                                                                                                                                                                                                                                                                                                                                                                                                                                                                                   |
| 9  |                        |    |                                                                                                                              |      |                                                                                                                                                                                                                                                                                                                                                                                                                                                                                                                                                                                                                                                                                                                                                                                                   |
| 10 | Statistical methods    | 12 | (a) Describe all statistical methods, including those used to control for confounding                                        | 5, 6 | “... correlation between PROMIS-10 and RAND-36 was assessed by calculating Pearson's correlation coefficient ( $r$ ), with a bias corrected and accelerated bootstrapping (BCa) method providing 95% confidence intervals. Agreement between PROMIS-10 and RAND-36 was assessed by constructing Bland-Altman plots with horizontal lines representing 95% limits of agreement (LOA) (mean difference $\pm 1.96$ SD). (...)For the internal consistency of the PROMIS-10, reliability analysis was used to calculate Cronbach's $\alpha$ s for both physical (4 items) and mental (4 items) subscales. A cut-off point of $\geq .70$ was chosen for indication of good reliability ( $\alpha$ ) and correlation ( $r$ ) [21]. A p-value of $< .05$ was considered to be statistically significant. |
| 11 |                        |    |                                                                                                                              |      |                                                                                                                                                                                                                                                                                                                                                                                                                                                                                                                                                                                                                                                                                                                                                                                                   |
| 12 |                        |    |                                                                                                                              |      |                                                                                                                                                                                                                                                                                                                                                                                                                                                                                                                                                                                                                                                                                                                                                                                                   |
| 13 |                        |    |                                                                                                                              |      |                                                                                                                                                                                                                                                                                                                                                                                                                                                                                                                                                                                                                                                                                                                                                                                                   |
| 14 |                        |    |                                                                                                                              |      |                                                                                                                                                                                                                                                                                                                                                                                                                                                                                                                                                                                                                                                                                                                                                                                                   |
| 15 |                        |    |                                                                                                                              |      |                                                                                                                                                                                                                                                                                                                                                                                                                                                                                                                                                                                                                                                                                                                                                                                                   |
| 16 |                        |    |                                                                                                                              |      |                                                                                                                                                                                                                                                                                                                                                                                                                                                                                                                                                                                                                                                                                                                                                                                                   |
| 17 |                        |    |                                                                                                                              |      |                                                                                                                                                                                                                                                                                                                                                                                                                                                                                                                                                                                                                                                                                                                                                                                                   |
| 18 |                        |    |                                                                                                                              |      |                                                                                                                                                                                                                                                                                                                                                                                                                                                                                                                                                                                                                                                                                                                                                                                                   |
| 19 |                        |    |                                                                                                                              |      |                                                                                                                                                                                                                                                                                                                                                                                                                                                                                                                                                                                                                                                                                                                                                                                                   |
| 20 |                        |    |                                                                                                                              |      |                                                                                                                                                                                                                                                                                                                                                                                                                                                                                                                                                                                                                                                                                                                                                                                                   |
| 21 |                        |    |                                                                                                                              |      |                                                                                                                                                                                                                                                                                                                                                                                                                                                                                                                                                                                                                                                                                                                                                                                                   |
| 22 |                        |    |                                                                                                                              |      |                                                                                                                                                                                                                                                                                                                                                                                                                                                                                                                                                                                                                                                                                                                                                                                                   |
| 23 |                        |    |                                                                                                                              |      |                                                                                                                                                                                                                                                                                                                                                                                                                                                                                                                                                                                                                                                                                                                                                                                                   |
| 24 |                        |    |                                                                                                                              |      |                                                                                                                                                                                                                                                                                                                                                                                                                                                                                                                                                                                                                                                                                                                                                                                                   |
| 25 |                        |    |                                                                                                                              |      |                                                                                                                                                                                                                                                                                                                                                                                                                                                                                                                                                                                                                                                                                                                                                                                                   |
| 26 |                        |    |                                                                                                                              |      |                                                                                                                                                                                                                                                                                                                                                                                                                                                                                                                                                                                                                                                                                                                                                                                                   |
| 27 |                        |    |                                                                                                                              |      |                                                                                                                                                                                                                                                                                                                                                                                                                                                                                                                                                                                                                                                                                                                                                                                                   |
| 28 |                        |    |                                                                                                                              |      |                                                                                                                                                                                                                                                                                                                                                                                                                                                                                                                                                                                                                                                                                                                                                                                                   |
| 29 |                        |    |                                                                                                                              |      |                                                                                                                                                                                                                                                                                                                                                                                                                                                                                                                                                                                                                                                                                                                                                                                                   |
| 30 |                        |    |                                                                                                                              |      |                                                                                                                                                                                                                                                                                                                                                                                                                                                                                                                                                                                                                                                                                                                                                                                                   |
| 31 |                        |    |                                                                                                                              |      |                                                                                                                                                                                                                                                                                                                                                                                                                                                                                                                                                                                                                                                                                                                                                                                                   |
| 32 |                        |    |                                                                                                                              |      |                                                                                                                                                                                                                                                                                                                                                                                                                                                                                                                                                                                                                                                                                                                                                                                                   |
| 33 |                        |    |                                                                                                                              |      |                                                                                                                                                                                                                                                                                                                                                                                                                                                                                                                                                                                                                                                                                                                                                                                                   |
| 34 |                        |    |                                                                                                                              |      |                                                                                                                                                                                                                                                                                                                                                                                                                                                                                                                                                                                                                                                                                                                                                                                                   |
| 35 |                        |    |                                                                                                                              |      |                                                                                                                                                                                                                                                                                                                                                                                                                                                                                                                                                                                                                                                                                                                                                                                                   |
| 36 |                        |    |                                                                                                                              |      |                                                                                                                                                                                                                                                                                                                                                                                                                                                                                                                                                                                                                                                                                                                                                                                                   |
| 37 |                        |    | (b) Describe any methods used to examine subgroups and interactions                                                          | 5, 6 | “Differences in patient characteristics were assessed using the independent samples $t$ -test and $\chi^2$ test.”                                                                                                                                                                                                                                                                                                                                                                                                                                                                                                                                                                                                                                                                                 |
| 38 |                        |    |                                                                                                                              |      |                                                                                                                                                                                                                                                                                                                                                                                                                                                                                                                                                                                                                                                                                                                                                                                                   |
| 39 |                        |    |                                                                                                                              |      |                                                                                                                                                                                                                                                                                                                                                                                                                                                                                                                                                                                                                                                                                                                                                                                                   |
| 40 |                        |    |                                                                                                                              |      |                                                                                                                                                                                                                                                                                                                                                                                                                                                                                                                                                                                                                                                                                                                                                                                                   |
| 41 |                        |    |                                                                                                                              |      |                                                                                                                                                                                                                                                                                                                                                                                                                                                                                                                                                                                                                                                                                                                                                                                                   |
| 42 |                        |    |                                                                                                                              |      |                                                                                                                                                                                                                                                                                                                                                                                                                                                                                                                                                                                                                                                                                                                                                                                                   |
| 43 |                        |    |                                                                                                                              |      |                                                                                                                                                                                                                                                                                                                                                                                                                                                                                                                                                                                                                                                                                                                                                                                                   |
| 44 |                        |    |                                                                                                                              |      |                                                                                                                                                                                                                                                                                                                                                                                                                                                                                                                                                                                                                                                                                                                                                                                                   |
| 45 |                        |    |                                                                                                                              |      |                                                                                                                                                                                                                                                                                                                                                                                                                                                                                                                                                                                                                                                                                                                                                                                                   |
| 46 |                        |    |                                                                                                                              |      |                                                                                                                                                                                                                                                                                                                                                                                                                                                                                                                                                                                                                                                                                                                                                                                                   |
| 47 |                        |    |                                                                                                                              |      |                                                                                                                                                                                                                                                                                                                                                                                                                                                                                                                                                                                                                                                                                                                                                                                                   |

1  
2  
3  
4  
5  
6  
7  
8  
9  
10  
11  
12  
13  
14  
15  
16  
17  
18  
19  
20  
21  
22  
23  
24  
25  
26  
27  
28  
29  
30  
31  
32  
33  
34  
35  
36  
37  
38  
39  
40  
41  
42  
43  
44  
45  
46  
47

|                |                                                                                                                                                                                                                                                                                                           |                                                                                                                                                                                                   |     |                                                                                                                                                                                                                                                                                                                                                                                                                                                                 |
|----------------|-----------------------------------------------------------------------------------------------------------------------------------------------------------------------------------------------------------------------------------------------------------------------------------------------------------|---------------------------------------------------------------------------------------------------------------------------------------------------------------------------------------------------|-----|-----------------------------------------------------------------------------------------------------------------------------------------------------------------------------------------------------------------------------------------------------------------------------------------------------------------------------------------------------------------------------------------------------------------------------------------------------------------|
|                |                                                                                                                                                                                                                                                                                                           |                                                                                                                                                                                                   |     | “An independent samples t-test was performed for assessing differences between assessment methods of the PROMIS-10. “                                                                                                                                                                                                                                                                                                                                           |
|                | (c) Explain how missing data were addressed                                                                                                                                                                                                                                                               |                                                                                                                                                                                                   | 6   | “... two had missing values in the physical total score, and one in both physical and mental total score of the PROMIS-10, another patient had missing values in both component scores of the RAND-36.”                                                                                                                                                                                                                                                         |
|                | (d) <i>Cohort study</i> —If applicable, explain how loss to follow-up was addressed<br><i>Case-control study</i> —If applicable, explain how matching of cases and controls was addressed<br><i>Cross-sectional study</i> —If applicable, describe analytical methods taking account of sampling strategy |                                                                                                                                                                                                   | n/a | n/a                                                                                                                                                                                                                                                                                                                                                                                                                                                             |
|                | (e) Describe any sensitivity analyses                                                                                                                                                                                                                                                                     |                                                                                                                                                                                                   | n/a | n/a                                                                                                                                                                                                                                                                                                                                                                                                                                                             |
| <b>Results</b> |                                                                                                                                                                                                                                                                                                           |                                                                                                                                                                                                   |     |                                                                                                                                                                                                                                                                                                                                                                                                                                                                 |
| Participants   | 13*                                                                                                                                                                                                                                                                                                       | (a) Report numbers of individuals at each stage of study—eg numbers potentially eligible, examined for eligibility, confirmed eligible, included in the study, completing follow-up, and analysed | 6   | “... 592 patients were identified who were diagnosed with a TIA or minor stroke one year prior to the assessment (...) 301 patients were not referred to BAC for follow-up care, 26 patients originated from a different region or country, and 8 died before BAC follow-up. Of the remaining 257 eligible patients, 182 were non-respondents (108 had no baseline measurements, 12 were insufficient proficient in Dutch, 11 died before follow-up at one year |

1  
2  
3  
4  
5  
6  
7  
8  
9  
10  
11  
12  
13  
14  
15  
16  
17  
18  
19  
20  
21  
22  
23  
24  
25  
26  
27  
28  
29  
30  
31  
32  
33  
34  
35  
36  
37  
38  
39  
40  
41  
42  
43  
44  
45  
46  
47

|                  |                                                      |                                                                                                                                          |   |                                                                                                                                                                                                                                                                                                                                                                                                                                                                       |
|------------------|------------------------------------------------------|------------------------------------------------------------------------------------------------------------------------------------------|---|-----------------------------------------------------------------------------------------------------------------------------------------------------------------------------------------------------------------------------------------------------------------------------------------------------------------------------------------------------------------------------------------------------------------------------------------------------------------------|
|                  |                                                      |                                                                                                                                          |   | post-stroke, 6 had dementia or a behavioural disorder, 28 refused participation, 13 were not responsive after initial consent, and 4 were not reachable by phone) and 75 patients were included for the study ...”                                                                                                                                                                                                                                                    |
|                  | (b) Give reasons for non-participation at each stage |                                                                                                                                          | 6 | <p>“... 301 patients were not referred to BAC for follow-up care, 26 patients originated from a different region or country, and 8 died before BAC follow-up. “</p> <p>“... 108 had no baseline measurements, 12 were insufficient proficient in Dutch, 11 died before follow-up at one year post-stroke, 6 had dementia or a behavioural disorder, 28 refused participation, 13 were not responsive after initial consent, and 4 were not reachable by phone...”</p> |
|                  | (c) Consider use of a flow diagram                   |                                                                                                                                          | 6 | “Figure 1. Flow chart of the study population”                                                                                                                                                                                                                                                                                                                                                                                                                        |
| Descriptive data | 14*                                                  | (a) Give characteristics of study participants (eg demographic, clinical, social) and information on exposures and potential confounders | 6 | “Of the 75 included patients, mean age was 68.9 ± 11.2 years, 51 (68.0%) were male, 60 (80.0%) had their first-ever ischemic event, 49 (65.3%) had the diagnosis minor stroke and 26 (34.7%) TIA. The ischemic event was located in the                                                                                                                                                                                                                               |

|              |     |                                                                                                                                                                                                              |  |   |                                                                                                                                                                                                         |
|--------------|-----|--------------------------------------------------------------------------------------------------------------------------------------------------------------------------------------------------------------|--|---|---------------------------------------------------------------------------------------------------------------------------------------------------------------------------------------------------------|
|              |     |                                                                                                                                                                                                              |  |   | left hemisphere in 30 (40.0%) patients, 23 (30.7%) in the right hemisphere, and 22 (29.3%) were vertebrobasilar.”                                                                                       |
|              |     | (b) Indicate number of participants with missing data for each variable of interest                                                                                                                          |  | 6 | “... two had missing values in the physical total score, and one in both physical and mental total score of the PROMIS-10, another patient had missing values in both component scores of the RAND-36.” |
|              |     | (c) Cohort study—Summarise follow-up time (eg, average and total amount)                                                                                                                                     |  | 7 | “Days between onset and follow-up, mean (SD)”                                                                                                                                                           |
| Outcome data | 15* | Cohort study—Report numbers of outcome events or summary measures over time                                                                                                                                  |  | 6 | “Mean (SD) scores for the PROMIS-10 were 45.8 (9.9) for PH, and 49.6 (9.1) for MH. Scores for the RAND-36 were 43.7 (11.4) for PCS, and 49.9 (10.7) for MCS.”                                           |
|              |     | Case-control study—Report numbers in each exposure category, or summary measures of exposure                                                                                                                 |  |   |                                                                                                                                                                                                         |
|              |     | Cross-sectional study—Report numbers of outcome events or summary measures                                                                                                                                   |  |   |                                                                                                                                                                                                         |
| Main results | 16  | (a) Give unadjusted estimates and, if applicable, confounder-adjusted estimates and their precision (eg, 95% confidence interval). Make clear which confounders were adjusted for and why they were included |  | 8 | “PROMIS-10 and RAND-36 physical and mental scores correlated significantly, $r = .81$ , BCa CI [.69, .88], $p < .001$ , and $r = .76$ , BCa CI [.64, .85], $p < .001$ , respectively ...”               |
|              |     | (b) Report category boundaries when continuous variables were categorized                                                                                                                                    |  | 5 | “... level of education (assessed on the Dutch 7-point scale ‘schaal van Verhage’, and afterwards stratified into three groups: low (primary school), average (secondary school                         |

1  
2  
3  
4  
5  
6  
7  
8  
9  
10  
11  
12  
13  
14  
15  
16  
17  
18  
19  
20  
21  
22  
23  
24  
25  
26  
27  
28  
29  
30  
31  
32  
33  
34  
35  
36  
37  
38  
39  
40  
41  
42  
43  
44  
45  
46  
47

---

low or medium level), and high  
(highest level secondary school,  
and/or college degree, and/or  
university degree) [20], ...”

---

|                                                                                                                  |     |     |
|------------------------------------------------------------------------------------------------------------------|-----|-----|
| (c) If relevant, consider translating estimates of relative risk into absolute risk for a meaningful time period | n/a | n/a |
|------------------------------------------------------------------------------------------------------------------|-----|-----|

---

Continued on next page

For peer review only

1  
2  
3  
4  
5  
6  
7  
8  
9  
10  
11  
12  
13  
14  
15  
16  
17  
18  
19  
20  
21  
22  
23  
24  
25  
26  
27  
28  
29  
30  
31  
32  
33  
34  
35  
36  
37  
38  
39  
40  
41  
42  
43  
44  
45  
46  
47

|                   |    |                                                                                                                                                            |        |                                                                                                                                                                                                                                                                                                                                                                                                                                                  |
|-------------------|----|------------------------------------------------------------------------------------------------------------------------------------------------------------|--------|--------------------------------------------------------------------------------------------------------------------------------------------------------------------------------------------------------------------------------------------------------------------------------------------------------------------------------------------------------------------------------------------------------------------------------------------------|
| Other analyses    | 17 | Report other analyses done—eg analyses of subgroups and interactions, and sensitivity analyses                                                             | 11, 12 | <p>“... mental health was found to be similar when comparing gender.”</p> <p>“However, when taking diagnosis into account, physical and mental scores between the two groups did not significantly differ for both PROMIS-10 and RAND-36.”</p>                                                                                                                                                                                                   |
| <b>Discussion</b> |    |                                                                                                                                                            |        |                                                                                                                                                                                                                                                                                                                                                                                                                                                  |
| Key results       | 18 | Summarise key results with reference to study objectives                                                                                                   | 10, 11 | <p>“... overall strong correlation between the PROMIS-10 and the RAND-36. QoL attributed to physical health was found to have a higher correlation than QoL attributed to mental health.”</p> <p>“... we compared two assessment methods of the PROMIS-10. Both physical and mental health assessed by telephone, although slightly inferior to on-paper assessment, was found to have a strong correlation with on-paper assessed RAND-36.”</p> |
| Limitations       | 19 | Discuss limitations of the study, taking into account sources of potential bias or imprecision. Discuss both direction and magnitude of any potential bias | 12, 13 | <p>“... small sample size ...”</p> <p>“... mean (<i>SD</i>) of 9.4 (14.7) days between assessment of RAND-36 on paper and assessment of PROMIS-10 by telephone ...”</p>                                                                                                                                                                                                                                                                          |

1  
2  
3  
4  
5  
6  
7  
8  
9  
10  
11  
12  
13  
14  
15  
16  
17  
18  
19  
20  
21  
22  
23  
24  
25  
26  
27  
28  
29  
30  
31  
32  
33  
34  
35  
36  
37  
38  
39  
40  
41  
42  
43  
44  
45  
46  
47

|                  |    |                                                                                                                                                                            |    |                                                                                                                                                                                                                                                                                                                                                                                                  |
|------------------|----|----------------------------------------------------------------------------------------------------------------------------------------------------------------------------|----|--------------------------------------------------------------------------------------------------------------------------------------------------------------------------------------------------------------------------------------------------------------------------------------------------------------------------------------------------------------------------------------------------|
|                  |    |                                                                                                                                                                            |    | “... no information regarding test-retest reliability of PROMIS-10 as is was only assessed at one time point.”                                                                                                                                                                                                                                                                                   |
|                  |    |                                                                                                                                                                            |    | “... confounding factors such as individual personality traits, extent of social support, socio-economic status and ethnicity was not accounted for in this study, while these factors undoubtedly impact self-reported quality of life.”                                                                                                                                                        |
| Interpretation   | 20 | Give a cautious overall interpretation of results considering objectives, limitations, multiplicity of analyses, results from similar studies, and other relevant evidence | 13 | “... support for the use of the Dutch version of the PROMIS-10 in patients after minor stroke or TIA in the Netherlands. Despite satisfactory validity of telephone assessment, careful interpretation is advised, especially when addressing mental health status. Additional data and further research with the PROMIS-10 in stroke patients is desirable for establishing more firm results.” |
| Generalisability | 21 | Discuss the generalisability (external validity) of the study results                                                                                                      | 12 | “The generalizability of our results is reduced due to our small sample size.”<br><br>“Timing of measurement of health status in stroke should also be taken into account. We assessed the PROMIS-10 at one year post-                                                                                                                                                                           |

1  
2  
3  
4  
5  
6  
7  
8  
9  
10  
11  
12  
13  
14  
15  
16  
17  
18  
19  
20  
21  
22  
23  
24  
25  
26  
27  
28  
29  
30  
31  
32  
33  
34  
35  
36  
37  
38  
39  
40  
41  
42  
43  
44  
45  
46  
47

---

stroke...”

---

**Other information**

|         |    |                                                                                                                                                               |    |                                                                                |
|---------|----|---------------------------------------------------------------------------------------------------------------------------------------------------------------|----|--------------------------------------------------------------------------------|
| Funding | 22 | Give the source of funding and the role of the funders for the present study and, if applicable, for the original study on which the present article is based | 14 | “This research is funded by the Foundation Teaching Hospital OLVG, Amsterdam.” |
|---------|----|---------------------------------------------------------------------------------------------------------------------------------------------------------------|----|--------------------------------------------------------------------------------|

\*Give information separately for cases and controls in case-control studies and, if applicable, for exposed and unexposed groups in cohort and cross-sectional studies.

**Note:** An Explanation and Elaboration article discusses each checklist item and gives methodological background and published examples of transparent reporting. The STROBE checklist is best used in conjunction with this article (freely available on the Web sites of PLoS Medicine at <http://www.plosmedicine.org/>, Annals of Internal Medicine at <http://www.annals.org/>, and Epidemiology at <http://www.epidem.com/>). Information on the STROBE Initiative is available at [www.strobe-statement.org](http://www.strobe-statement.org).

For peer review only



# BMJ Open

## Validity of the PROMIS-10 Global Health assessed by telephone and on paper in minor stroke and transient ischemic attack in the Netherlands

|                                 |                                                                                           |
|---------------------------------|-------------------------------------------------------------------------------------------|
| Journal:                        | <i>BMJ Open</i>                                                                           |
| Manuscript ID                   | bmjopen-2017-019919.R2                                                                    |
| Article Type:                   | Research                                                                                  |
| Date Submitted by the Author:   | 23-May-2018                                                                               |
| Complete List of Authors:       | Lam, Ka-Hoo; OLVG, Neurology<br>Kwa, Vincent; Onze Lieve Vrouwe Gasthuis, Neurology       |
| <b>Primary Subject Heading</b>: | Neurology                                                                                 |
| Secondary Subject Heading:      | Global health                                                                             |
| Keywords:                       | Stroke < NEUROLOGY, Transient ischemic attack, Quality of life, Patient-reported outcomes |
|                                 |                                                                                           |

SCHOLARONE™  
Manuscripts

Peer Review Only

**Title**

Validity of the PROMIS-10 Global Health assessed by telephone and on paper in minor stroke and transient ischemic attack in the Netherlands

**Running title**

PROMIS-10 in minor stroke and transient ischemic attack

**Authors**

1. Ka-Hoo Lam, MD, department of Neurology, OLVG Oost hospital, Oosterpark 9, 1091AC Amsterdam, the Netherlands. ORCID: 0000-0003-0926-1445.
2. Vincent I.H. Kwa, MD, PhD, department of Neurology, OLVG Oost hospital, Oosterpark 9, 1091AC Amsterdam, the Netherlands. ORCID: 0000-0002-0942-6206.

**Corresponding author**

Vincent I.H. Kwa

Telephone: +31205993044

Fax: +31205993845

E-mail: v.i.h.kwa@olvg.nl

## Abstract

*Objectives:* Dysfunction after transient ischemic attack (TIA) and minor stroke is often underestimated by clinical measures. Patient-reported outcome measures used in value-based healthcare may help detecting these problems. The PROMIS-10 Global Health is a concise patient-centered outcome measuring tool proposed for assessing health status in stroke patients. This study aims to address the validity of the Dutch PROMIS-10 in stroke patients in the Netherlands and also aims to compare telephone versus on-paper assessment.

*Design:* Observational cohort study.

*Setting:* Single-centre hospital in the Netherlands.

*Participants:* 75 patients who were diagnosed with TIA or minor stroke and discharged without rehabilitation treatment one year ago (between December 2014 and January 2016) completed the study.

### *Primary and secondary outcome measures*

PROMIS-10 physical and mental health scores assessed one year post-stroke on paper ( $n = 37$ ) and by telephone ( $n = 38$ ) was compared to RAND-36 physical and mental component scores assessed on paper.

*Results:* PROMIS-10 and RAND-36 correlated significantly in physical health,  $r = .81$ , 95% CI [.69, .88], and mental health,  $r = .76$ , 95% CI [.64, .85]. Paper-and-pencil assessed correlations were  $r = .87$  and  $.79$  for physical and mental health, respectively. Telephone assessed correlations were  $r = .76$  and  $.73$  for physical and mental health, respectively. Internal consistency analysis indicated high reliabilities for both health components of the PROMIS-10, all Cronbach's  $\alpha > .70$ .

*Conclusions:* The Dutch PROMIS-10 was found to strongly correlate with the RAND-36. Paper-and-pencil assessment was found to have a higher correlation than telephone assessment. This study provides support for the use of the Dutch PROMIS-10 in assessing health status in patients after TIA and minor stroke.

### **Strengths and limitations of this study**

- This is the first study that addresses the PROMIS-10 as measuring tool for health status in TIA and minor stroke patients in the Netherlands.
- Subjects were very similarly distributed in terms of clinical and socioeconomic factors between different comparator groups.
- Generalizability of the study results is reduced due to a relatively small sample size.

- There was a time window between assessment of paper-based RAND-36 and telephone-based PROMIS-10.
- PROMIS-10 was assessed at one time point only; this study provides no insight on test-retest reliability of the PROMIS-10.

**Keywords:** quality of life, patient-reported outcomes, stroke, transient ischemic attack

## Introduction

Following a stroke many patients experience persistent deficits and reduced functional independence [1], while full recovery is assumed in TIA and minor stroke patients who are discharged to home without further rehabilitation treatment [2]. However, previous studies in TIA and minor stroke patients found high prevalence of dysfunction across all domains of health, of which cognitive and emotional problems were most notable [3-6]. These symptoms may be overlooked with conventional clinical measures such as the neurological examination or the Barthel Index, but can be a major contributor to an impaired performance of activities of daily living and a diminished quality of life (QoL) [2,7-9]. This emphasizes the importance of patient-reported outcomes (PROs), which measure health status reported directly from the patient [10]. Measuring PROs is also an essential principal in the emerging value-based healthcare [11]. As such, health measurement is shifting from process measurement towards outcome measurement to improve quality while reducing costs [12]. This initiated the proposal of a Stroke Standard Set for measuring health in stroke by the International Consortium for Health Outcomes Measurement (ICHOM) [13]. The expert group recommends the Patient Reported Outcomes Measurement Information System 10-Question Short Form (PROMIS-10 Global Health) for assessing health status after stroke [14]. The PROMIS-10 has been translated into Dutch by the Dutch-Flemish PROMIS group (<http://www.dutchflemishpromis.nl>), but has not yet been validated or compared with existing validated instruments in stroke patients [15].

## *Aims*

This study aims to investigate the construct validity and reliability of the Dutch PROMIS-10 in TIA and minor stroke patients in the Netherlands. We also aim to evaluate different assessment methods of the PROMIS-10: on paper (filled in by the patient) assessment versus assessment through the telephone. As telephone assessment might be more feasible in the population of stroke patients, which mainly consists of elderly patients.

## Methods

### *Study design*

This single-centre observational cohort study was part of a concurrent quality of life study at OLVG Oost hospital. Between January 2016 and January 2017 medical records of patients diagnosed with a TIA or minor stroke one year ago were screened for eligibility, as Mierlo et al. (2016) reported improvement of quality of life occurring the most in the first six months and up to one year after stroke [16]. Eligible patients were approached by telephone for study participation. Following verbal consent to study participation, study materials were sent by mail; study information, consent form, PROMIS-10, RAND-36 (a health-related quality of life measure), and a short form for obtaining socio-demographic data. PROMIS-10 was assessed on paper from January 1 to July 31, 2016 and by telephone from August 1, 2016 to January 31, 2017. On paper assessments of the PROMIS-10 and RAND-36 were completed by the patients at home on their own or with help of a proxy. Telephone assessments of the PROMIS-10 were carried out by reading out the exact questions and marking the given answers. Clinical data were extracted from medical records. Full ethical approval was given by the Medical Research Ethics Committees United (MEC-U), Nieuwegein. Informed consent was obtained from all individual participants included in the study. Clinical data (age, gender, diagnosis, stroke localization and incidence) of non-participating and excluded eligible patients were recorded in a non-identifiable manner without requiring consent.

### *Subjects*

Eligibility included a clinical diagnosis of TIA or minor stroke followed by discharge without inpatient rehabilitation treatment. MRI is not part of the standard diagnostic work-up of stroke but was performed whenever other causes than ischemia could not be ruled out. For this study TIA and minor stroke were defined as acute neurological deficits with symptoms of stroke on admission that fully resolves within 24 hours and three days, respectively.

As standard practice TIA and stroke patients discharged to home are re-evaluated shortly after discharge by a specialized stroke nurse. If during the re-evaluation residual or new symptoms are present or suspected, patients are referred to the Beroerte Adviescentrum (BAC, 'Stroke Advice Centre'), a central body that coordinates and effectuates outpatient care for stroke patients. As the BAC measures baseline health status, which is an inclusion

1  
2  
3 criterion for the concurrent QoL study, patients who were not referred to the BAC or did not complete baseline  
4 measurements were deemed ineligible.

5  
6 Exclusion criteria were: age below 18 years, persistent neurological symptoms three days post-stroke,  
7  
8 insufficient proficiency in Dutch, dementia or any behavioural disorder that may compromise study participation.  
9

### 10 11 12 *Measures*

13  
14 The PROMIS-10 is a 10-item measure for self-reported QoL, physical health, and mental health. It has been shown  
15 to be reliable, precise and comparable to legacy instruments [17]. Physical health (PH) and mental health (MH) T-  
16 scores can be calculated through an online scoring service provided by Assessment Center  
17  
18 (www.assessmentcenter.net/ac\_scoring-service). The T-score distributions are standardized with mean (*SD*) of 50  
19  
20 (10) for the United States' (US) general population, where higher scores indicate better outcome. In this study a  
21  
22 Dutch version of the PROMIS-10 was used [15]. As standardized scores for the Netherlands are unavailable, T-  
23  
24 scores were calculated using the US population standard scores.  
25  
26

27  
28 The RAND-36 (identical to the SF-36) is a widely used QoL measure, comprising of 36 items covering a  
29 wide range of health domains [18]. Two component scores can be derived: physical (PCS) and mental (MCS)  
30 component score. PCS and MCS are standardized with mean (*SD*) of 50 (10), with higher scores reflecting better  
31 outcome. The RAND-36 has been translated and validated into multiple languages, including Dutch [19]. In this  
32 study the Dutch RAND-36 version 2 was used. However, PCS and MCS were calculated using US-standardized  
33 weights for a more equal comparison to the PROMIS-10, which was calculated similarly.  
34  
35

36  
37 Socio-demographic data collected were: marital status, level of education (assessed on the Dutch 7-point  
38 scale 'schaal van Verhage', and afterwards stratified into three groups: low (primary school), average (secondary  
39 school low or medium level), and high (highest level secondary school, and/or college degree, and/or university  
40 degree) [20], living arrangement, and work status.  
41  
42  
43  
44  
45  
46  
47  
48

### 49 *Data analysis*

50  
51 Numerical variables were summarized by the mean  $\pm$  *SD*, and frequencies and percentages were used for binary and  
52 categorical variables. Differences in patient characteristics were assessed using the independent samples *t*-test and  $\chi^2$   
53 test for continuous and categorical variables, respectively. For assessing construct validity, correlation between  
54  
55  
56  
57  
58  
59  
60

1  
2  
3 PROMIS-10 and RAND-36 was assessed by calculating Pearson's correlation coefficient ( $r$ ), with a bias corrected  
4 and accelerated bootstrapping (BCa) method providing 95% confidence intervals. Agreement between PROMIS-10  
5 and RAND-36 was assessed by constructing Bland-Altman plots with horizontal lines representing the mean  
6 difference and 95% limits of agreement (LOA) (mean difference  $\pm 1.96$  SD) [21]. An independent samples  $t$ -test was  
7 performed for assessing differences between assessment methods of the PROMIS-10. For the internal consistency of  
8 the PROMIS-10, reliability analysis was used to calculate Cronbach's  $\alpha$ s for both physical (4 items) and mental (4  
9 items) subscales. A cut-off point of  $\geq .70$  was chosen for indication of good reliability ( $\alpha$ ) and correlation ( $r$ ) [22]. A  
10  $p$ -value of  $< .05$  was considered to be statistically significant. All statistical analysis was performed using IBM SPSS  
11 version 22.

### 12 *Patient and public involvement*

13  
14 The development of the research question was based on earlier research on patients' experience of our care after a  
15 TIA or minor stroke. Many patients had hidden signs and symptoms that were not recognized by doctors at first  
16 sight. We are now developing 'Value-based healthcare' with help of patient related outcome measures like the one  
17 that is investigated in this study, to be able to detect these hidden signs and symptoms. In the informed consent form  
18 we stated that after the end of the study we will send a letter to the participants to inform them about the results of  
19 the study.

### 20 **Results**

21  
22 A total of 592 patients were identified who were diagnosed with a TIA or minor stroke one year prior to the  
23 assessment (from December 2014 to January 2016). Following re-evaluation by their physician, 301 patients were  
24 not referred to BAC for follow-up care, 26 patients originated from a different region or country, and 8 died before  
25 BAC follow-up. Of the remaining 257 eligible patients, 182 were non-respondents (108 had no baseline  
26 measurements, 12 were insufficient proficient in Dutch, 11 died before follow-up at one year post-stroke, 6 had  
27 dementia or a behavioural disorder, 28 refused participation, 13 were not responsive after initial consent, and 4 were  
28 not reachable by phone) and 75 patients were included for the study (see figure 1).

### Figure 1. Flow chart of the study population

[insert figure 1.]

Of the 75 included patients, mean age was  $68.9 \pm 11.2$  years, 51 (68.0%) were male, 60 (80.0%) had their first-ever ischemic event, 49 (65.3%) had the diagnosis minor stroke and 26 (34.7%) TIA. The ischemic event was located in the left hemisphere in 30 (40.0%) patients, 23 (30.7%) in the right hemisphere, and 22 (29.3%) were vertebrobasilar. There were no statistically significant differences between the study population and the non-respondents. Mean (*SD*) scores for the PROMIS-10 were 45.8 (9.9) for PH, and 49.6 (9.1) for MH. Scores for the RAND-36 were 43.7 (11.4) for PCS, and 49.9 (10.7) for MCS.

In 37 patients the PROMIS-10 and RAND-36 were assessed on paper; two had missing values in the physical total score, and one in both physical and mental total score of the PROMIS-10, another patient had missing values in both component scores of the RAND-36. These 37 patients formed the 'paper-and-pencil group'. 38 patients completed the PROMIS-10 by telephone (and the RAND-36 on paper), these patients formed the 'telephone group'. Patient characteristics of both groups are summarized in table 1. No statistically significant differences were observed between the two groups.

**Table 1. Patient characteristics between the study population ( $n = 75$ , divided in 'paper-and-pencil' and 'telephone' group) and non-respondents ( $n = 182$ )**

| Characteristic                                       | Study population ( $n = 75$ )      |                             |                   | Non-respondents ( $n = 182$ ) | <i>p</i> -value   |
|------------------------------------------------------|------------------------------------|-----------------------------|-------------------|-------------------------------|-------------------|
|                                                      | 'Paper-and-pencil'<br>( $n = 37$ ) | 'Telephone'<br>( $n = 38$ ) | <i>p</i> -value   |                               |                   |
| Days between onset and follow-up, mean ( <i>SD</i> ) | 374.8 (59.7)                       | 375.7 (30.7)                |                   | n/a                           |                   |
| Age, <i>y</i> , mean ( <i>SD</i> )                   | 67.4 (9.9)                         | 70.4 (12.2)                 | .258 <sup>a</sup> | 68.5 (12.2)                   | .810 <sup>a</sup> |
| Gender                                               |                                    |                             | .160 <sup>b</sup> |                               | .053 <sup>b</sup> |
| Female                                               | 9 (24.3)                           | 15 (39.5)                   |                   | 82 (45.1)                     |                   |
| Male                                                 | 28 (75.7)                          | 23 (60.5)                   |                   | 100 (54.9)                    |                   |
| Diagnosis                                            |                                    |                             | .170 <sup>b</sup> |                               | .086 <sup>b</sup> |



|                          |           |           |                   |            |                   |
|--------------------------|-----------|-----------|-------------------|------------|-------------------|
| TIA                      | 10 (27.0) | 16 (42.1) |                   | 44 (24.2)  |                   |
| Minor stroke             | 27 (73.0) | 22 (57.9) |                   | 138 (75.8) |                   |
| Localization             |           |           | .921 <sup>b</sup> |            | .683 <sup>c</sup> |
| Right hemisphere         | 12 (32.4) | 11 (28.9) |                   | 51 (28.0)  |                   |
| Left hemisphere          | 14 (37.8) | 16 (42.1) |                   | 77 (42.3)  |                   |
| Vertebrobasilar          | 11 (29.7) | 11 (28.9) |                   | 47 (25.8)  |                   |
| Ocular                   | 0 (0.0)   | 0 (0.0)   |                   | 3 (1.6)    |                   |
| Other/unknown            | 0 (0.0)   | 0 (0.0)   |                   | 4 (2.2)    |                   |
| Stroke incidence         |           |           | .729 <sup>b</sup> |            | .469 <sup>b</sup> |
| First ever               | 29 (78.4) | 31 (81.6) |                   | 138 (75.8) |                   |
| Relapse                  | 8 (21.6)  | 7 (18.4)  |                   | 44 (24.2)  |                   |
| Marital status           |           |           | .999 <sup>c</sup> |            |                   |
| Married                  | 22 (59.5) | 22 (57.9) |                   | n/a        |                   |
| Unmarried                | 13 (35.1) | 14 (36.8) |                   | n/a        |                   |
| Widowed                  | 2 (5.4)   | 2 (5.3)   |                   | n/a        |                   |
| Education                |           |           | .532 <sup>c</sup> |            |                   |
| Low                      | 5 (13.9)  | 3 (7.9)   |                   | n/a        |                   |
| Average                  | 16 (44.4) | 21 (55.3) |                   | n/a        |                   |
| High                     | 15 (41.7) | 14 (36.8) |                   | n/a        |                   |
| Living arrangement       |           |           | .925 <sup>b</sup> |            |                   |
| Alone                    | 15 (40.5) | 15 (39.5) |                   | n/a        |                   |
| With spouse/relative(s)  | 22 (59.5) | 23 (60.5) |                   | n/a        |                   |
| Current work status      |           |           | .969 <sup>b</sup> |            |                   |
| Back to work             | 8 (21.6)  | 8 (21.1)  |                   | n/a        |                   |
| Not (fully) back to work | 6 (16.2)  | 7 (18.4)  |                   | n/a        |                   |

|         |           |           |  |     |  |
|---------|-----------|-----------|--|-----|--|
| Retired | 23 (62.2) | 23 (60.5) |  | n/a |  |
|---------|-----------|-----------|--|-----|--|

Abbreviations: TIA = transient ischemic attack, n/a = not available. All data are expressed as n (%), except where specified. <sup>a</sup> t-test; <sup>b</sup>  $\chi^2$  test; <sup>c</sup> Fisher's Exact test.

### Construct validity

PROMIS-10 and RAND-36 physical and mental scores correlated significantly,  $r = .81$ , BCa CI [.69, .88],  $p < .001$ , and  $r = .76$ , BCa CI [.64, .85],  $p < .001$ , respectively (see figure 2). Figure 3 shows the Bland-Altman plots for PROMIS-10 and RAND-36 physical and mental health. The mean difference between the measures were -1.9 and 0.1 for physical health and mental health, respectively. For both physical and mental health, the paired differences and averages were fairly evenly scattered within the upper and lower LOA.

**Figure 2.** Scatterplots of PROMIS-10 and RAND-36 physical (A) and mental health scores (B).

[Insert Figure 2.]

**Figure 3.** Bland-Altman plots of PROMIS-10 and RAND-36 physical (A) and mental health scores (B). The mean of both measures (x-axis) was plotted against their difference (y-axis). The continuous line represents the mean difference and the dashed lines represent the 95% limits of agreement.

[Insert Figure 3.]

When scores for the PROMIS-10 PH and MH were divided between 'paper-and-pencil' and 'telephone' groups, correlation between the PROMIS-10 and RAND-36 physical and mental health increased in the 'paper-and-pencil' group and decreased in the 'telephone' group. The results are summarized in table 2. Mean PH score was lower in the 'paper-and-pencil' group than in the 'telephone' group. This difference was not statistically significant. The mean MH score was also lower in the 'paper-and-pencil' group than in the 'telephone' group. This difference however, was statistically significant. Mean scores of the RAND-36 PCS and MCS were not statistically significantly different among the two groups based on assessment method of PROMIS-10. The results are summarized in table 3.

**Table 2. Bivariate correlations between PROMIS-10 and RAND-36**

|                              | RAND-36            |                    | <i>n</i> |
|------------------------------|--------------------|--------------------|----------|
|                              | PCS                | MCS                |          |
| PROMIS-10                    |                    |                    |          |
| PH                           | .82*<br>[.70, .90] | —                  | 71       |
| MH                           | —                  | .70*<br>[.57, .82] | 73       |
| PROMIS-10 (paper-and-pencil) |                    |                    |          |
| PH                           | .88*<br>[.78, .93] | —                  | 33       |
| MH                           | —                  | .70*<br>[.54, .84] | 35       |
| PROMIS-10 (telephone)        |                    |                    |          |
| PH                           | .77*<br>[.54, .91] | —                  | 38       |
| MH                           | —                  | .70*<br>[.50, .86] | 38       |

\* $p < .01$ . BCa bootstrap 95% CIs reported in brackets. Abbreviations: PCS = physical component score, MCS = mental component score, PH = physical health, MH = mental health.

**Table 3. Independent samples t-tests comparing PROMIS-10 and RAND-36, between 'paper-and-pencil' and 'telephone' group**

|              | 'Paper-and-pencil' |          | 'Telephone'        |          | 95% CI for mean difference | <i>t</i> -value (df) | <i>p</i> -value |
|--------------|--------------------|----------|--------------------|----------|----------------------------|----------------------|-----------------|
|              | Mean ( <i>SD</i> ) | <i>n</i> | Mean ( <i>SD</i> ) | <i>n</i> |                            |                      |                 |
| PROMIS-10 PH | 44.1 (10.1)        | 34       | 47.2 (9.5)         | 38       | -7.67, 1.57                | -1.32 (70)           | .192            |

|              |             |    |             |    |               |            |      |
|--------------|-------------|----|-------------|----|---------------|------------|------|
| PROMIS-10 MH | 45.6 (8.5)  | 36 | 53.4 (8.0)  | 38 | -11.57, -3.90 | -4.02 (72) | .001 |
| RAND-36 PCS  | 48.7 (12.2) | 36 | 51.0 (11.8) | 38 | -7.86, 3.27   | -0.82 (72) | .414 |
| RAND-36 MCS  | 34.7 (8.4)  | 36 | 37.7 (7.6)  | 38 | -6.64, 0.80   | -1.56 (72) | .122 |

**Abbreviations: PH = physical health, MH = mental health, PCS = physical component score, MCS = mental component score.**

### *Internal consistency*

The PROMIS-10 demonstrated high reliabilities for both PH, Cronbach's  $\alpha = .79$ , and MH, Cronbach's  $\alpha = .83$ .

Similar  $\alpha$ s were observed for the PROMIS-10 assessed by paper-and-pencil and telephone:  $\alpha = .82$  and  $.81$  for PH and MH, respectively, in the 'paper-and-pencil' group;  $\alpha = .77$  and  $.80$  for PH and MH, respectively, in the 'telephone' group.

### **Discussion**

In this study we used the Dutch PROMIS-10 to assess QoL in patients at one year after TIA or minor stroke. Our results indicate an overall strong correlation between the PROMIS-10 and the RAND-36. QoL attributed to physical health was found to have a higher correlation than QoL attributed to mental health. This could be explained due to physical health tending to be more objective and less multidimensional in nature. Whereas mental health is generally more subjective and an exact cause is less easy to pinpoint, which makes mental health more prone to recall bias. Additionally, physical health tends to be more consistent over time, while mental health is more prone to fluctuations. As PROMIS-10 and RAND-36 measures self-reported health over a period in time, timing of assessment is more likely to affect mental health than physical health. Nonetheless, both correlations were within the range considered to be moderate to high. Bland-Altman plots demonstrated good agreement between PROMIS-10 and RAND-36. The average discrepancy between PROMIS-10 and RAND-36 was small and not clinically relevant. Visual inspection of Bland-Altman plots between PROMIS-10 and RAND-36 physical and mental health revealed no obvious trend or inconsistent variability.

Subsequently, we compared two assessment methods of the PROMIS-10. Both physical and mental health assessed by telephone, although slightly inferior to on-paper assessment, was found to have a strong correlation with on-paper assessed RAND-36. No studies were found that addressed the validity of telephone assessment of the PROMIS-10. Two studies however, evaluated telephone assessment of other PROMIS measures

1  
2  
3 [23,24]. In line with our results, both studies provide support for telephone assessment. One of the studies compared  
4 telephone to self-administered assessment; aside from small mode effects most likely related to study design, no  
5 apparent differences were reported as was found in our study [24]. In our study we suspect that lack of visual support  
6 when choosing a score within a range might have been contributing to a lower correlation. Other noted caveats in  
7 telephone assessment in our study were hesitation, choosing scores in between, and the tendency to substantiate  
8 choices during assessment.  
9

10  
11  
12  
13  
14           When comparing PROMIS-10 and RAND-36 scores between the ‘paper-and-pencil’ and ‘telephone’  
15 group, it is notable that scores of the on paper assessed RAND-36 were similar in both physical and mental health,  
16 whereas PROMIS-10 mental health scores were significantly higher (i.e. better) in the ‘telephone’ group compared to  
17 the ‘paper-and-pencil’ group. This relatively small difference is most likely attributable to the small sample size.  
18 However, we also speculate that patients could be inclined to appear better, answer more socially desirable, and are  
19 less inclined to open up about mental problems in a direct telephone interview as opposed to on-paper assessment.  
20 This speculation can be supported by findings by Perkins et al. (1998) and Erhart et al. (2009), who reported  
21 statistical significant differences for mental health components in favour of telephone assessment, compared to self-  
22 administration by mail [25,26].  
23  
24  
25  
26  
27  
28  
29  
30

31  
32           Other possible causes for the difference between our PROMIS-10 ‘telephone’ and ‘paper-and-pencil’  
33 group could be due to differences in diagnosis (TIA of minor stroke) or gender. However, subgroup analysis revealed  
34 no significant differences for both physical and mental health scores between the two groups for both PROMIS-10  
35 and RAND-36. The remaining patient characteristics obtained in this study were nearly identically distributed among  
36 both groups and are therefore unlikely to have confounded the results.  
37  
38  
39  
40  
41  
42

#### 43 *Limitations*

44  
45 The generalizability of our results is reduced due to our small sample size. Moreover, our study population does not  
46 cover the full range of stroke patients. Aside from exclusion of major stroke, as our target population were TIA and  
47 minor stroke patients, a large number of patients were not included as referral to the BAC based on symptoms was  
48 not indicated. Nonetheless, these relatively mildly affected patients still represent part of our target population. The  
49 same applies to patients who were excluded due to an insufficient proficiency in Dutch. In contrast to  
50  
51  
52  
53  
54  
55  
56  
57  
58  
59  
60

1  
2  
3 generalizability, these limitations should barely affect our results, as patient characteristics were similar among the  
4 included patients and the non-respondents.

5  
6 Noteworthy is the mean (*SD*) of 12.5 (7.6) days between assessment of RAND-36 on paper and  
7 assessment of PROMIS-10 by telephone in our 'telephone' group. On the other hand, on paper assessment of the  
8 PROMIS-10 is (assumed to be) completed on the same day. Health status might change over these few days.  
9  
10 Moreover, three items of PROMIS-10 are concerned with the past seven days (fatigue, emotional problems, and  
11 pain).  
12  
13  
14  
15

16  
17 Timing of measurement of health status in stroke should also be taken into account. We assessed the  
18 PROMIS-10 at one year post-stroke, in contrast to the 3 months post-stroke proposed by the ICHOM consensus  
19 group [13]. In our current study one year post-stroke was chosen based on the results of Mierlo et al. (2016), who  
20 reported improvement of quality of life occurring up to one year after stroke, with most changes occurring within the  
21 first six months [16]. Another limitation is that there is no information regarding test-retest reliability of PROMIS-10  
22 as is was only assessed at one time point.  
23  
24  
25  
26  
27

28  
29 Lastly, possible confounding factors such as individual personality traits, extent of social support, socio-  
30 economic status and ethnicity was not accounted for in this study, while these factors undoubtedly impact self-  
31 reported quality of life.  
32  
33  
34  
35

### 36 *Conclusions*

37  
38 This study provides support for the use of the Dutch version of the PROMIS-10 in patients after minor stroke or TIA  
39 in the Netherlands. Despite satisfactory validity of telephone assessment, careful interpretation is advised, especially  
40 when addressing mental health status. Additional data and further research with the PROMIS-10 in stroke patients is  
41 desirable for establishing more firm results.  
42  
43  
44  
45  
46

### 47 **Contributorship statement**

48  
49 K.H. Lam and V.I.H. Kwa state that the following criteria for contributorship, in accordance to the ICMJE criteria  
50 for authorship, are met:

51  
52 - Substantial contributions to the conception or design of the work; or the acquisition, analysis, or interpretation of  
53 data for the work; AND  
54  
55  
56  
57  
58  
59  
60

- 1  
2  
3 - Drafting the work or revising it critically for important intellectual content; AND  
4  
5 - Final approval of the version to be published; AND  
6  
7 - Agreement to be accountable for all aspects of the work in ensuring that questions related to the accuracy or  
8  
9 integrity of any part of the work are appropriately investigated and resolved.  
10

11  
12 In addition to being accountable for the parts of the work the authors have done, all authors are able to identify which  
13  
14 co-authors are responsible for specific other parts of the work. In addition, the authors have confidence in the  
15  
16 integrity of the contributions of our co-authors.  
17

### 18 19 20 **Acknowledgements**

21  
22 The authors would like to thank all patients that have participated in the study, M. Lagerwaard for data collection,  
23  
24 the BAC-team: I. Bekker, J. Kramer, and B. Notz, for their continuous efforts in providing care for stroke patients, C.  
25  
26 Terwee for technical support with the PROMIS-10, and D. van Rooijen for providing support in statistical analysis.  
27

### 28 29 30 **Competing interests**

31  
32 The authors declare that they have no competing interests.  
33

### 34 35 36 **Funding statement**

37  
38 This research is funded by the Foundation Teaching Hospital OLVG, Amsterdam.  
39

### 40 41 42 **Data sharing statement**

43  
44 Individual participant data collected during the study that underlie the results reported in the manuscript, after  
45  
46 deidentification (text, tables and figures), will be available for data sharing. The data will be available immediately  
47  
48 after publication and ends 36 months after publication. The data will be available to investigators whose proposed  
49  
50 use of the data has been approved by an independent review committee. Up to 36 months after publication, the data  
51  
52 can be requested and accessed electronically.  
53  
54  
55  
56  
57  
58  
59  
60

## References

1. Winstein CJ, Stein J, Arena R, et al. Guidelines for adult stroke rehabilitation and recovery: a guideline for healthcare professionals from the American Heart Association/American Stroke Association. *Stroke*, 2016;47:98-169.
2. Edwards DF, Hahn M, Baum C, and Dromerick AW. The impact of mild stroke on meaningful activity and life satisfactions. *Journal of Stroke and Cerebrovascular Diseases*, 2006;15:151-157.
3. Arts MLJ, Kwa VIH, and Dahmen R. High satisfaction with an individualised stroke care programme after hospitalization of patients with a TIA or minor stroke: a pilot study. *Cerebrovascular Diseases*, 2008;25:566-571.
4. Muus I, Petzold M, and Ringsberg KC. Health-related quality of life among Danish patients 3 and 12 months after TIA or mild stroke. *Scandinavian Journal of Caring Sciences*, 2010;24:211-218.
5. Radman N, Staub F, Aboulafia-Brakha A, Bogousslavsky J, and Annoni JM. Poststroke fatigue following minor infarcts: a prospective study. *Neurology*, 2012;79:1422-1427.
6. Moran GM, Fletcher B, Feltham MG, Calvert M, Sackley C, and Marshall T. Fatigue, psychological and cognitive impairment following transient ischaemic attack and minor stroke: a systematic review. *European Journal of Neurology*, 2014;21:1258-1267.
7. Duncan PW, Samsa GP, Weinberger M, et al. Health status of individuals with mild stroke. *Stroke*, 1997;28:740-745.
8. Suenkeler IH, Nowak M, Misselwitz B, et al. Timecourse of health-related quality of life as determined 3, 6 and 12 months after stroke: relationship to neurological deficit, disability and depression. *Journal of Neurology*, 2002;249:1160-1167.
9. Verbraak ME, Hoeksma AF, Lindeboom R, and Kwa VIH. Subtle problems in activities of daily living after a Transient Ischemic Attack or an apparently fully recovered non-disabling stroke. *Journal of Stroke and Cerebrovascular Diseases*, 2012;21:124-130.
10. Higgins JPT and Greene S. Cochrane handbook for systematic reviews of interventions version 5.1.0. <http://handbook.cochrane.org> (updated March 2011).
11. Porter ME. Value-based health care delivery. *Annals of Surgery*, 2008;248:503-509.
12. Porter ME. What is value in health care? *New England Journal of Medicine*, 2010;363:2477-2481.



13. Salinas J, Sprinkhuizen SM, Ackerson T, et al. An international standard set of patient-centered outcome measures after stroke. *Stroke*, 2016;47:180-186.
14. Cella D, Yount S, Rothrock N, et al. The Patient-Reported Outcomes Measurement Information System (PROMIS): Progress of an NIH roadmap cooperative group during its first two years. *Medical Care*, 2007;45:3-11.
15. Terwee CB, Roorda LD, De Vet HCW, et al. Dutch-Flemish translation of 17 item banks from the Patient-Reported Outcomes Measurement Information System (PROMIS). *Quality of Life Research*, 2014;23:1733-1741.
16. Van Mierlo ML, Van Heugten CM, Post MW, Hajos TRS, Kappelle LJ, and Visser-Meily JMA. Quality of life during the first two years post stroke: the Restore4Stroke cohort study. *Cerebrovascular Diseases*, 2016;41:19-26.
17. Cella D, Riley W, Stone A, et al. The Patient-Reported Outcomes Measurement Information System (PROMIS) developed and tested its first wave of adult self-reported health outcome item banks: 2005-2008. *Journal of Clinical Epidemiology*, 2010;63:1179-1194.
18. Hays RD, Bjorner JB, Revicki DA, Spritzer KL, and Cella D. Development of physical and mental health summary scores from the Patient-Reported Outcomes Measurement Information System (PROMIS) global items. *Quality of Life Research*, 2009;18:873-880.
19. Hays RD and Morales LS. The RAND-36 measure of health-related quality of life. *Annals of Medicine*, 2001;33:350-357.
20. Verhage F. Intelligence and age (in Dutch). Assen: Van Gorcum; 1964.
21. Bland JM and Altman DG. Statistical methods for assessing agreement between two methods of clinical measurement. *Lancet*, 1986;1:307-310.
22. Field AP. *Discovering statistics using IBM SPSS Statistics (4th edition)*. SAGE, London, 2014.
23. Quach QW, Langer MM, Chen RC, et al. Reliability and validity of PROMIS measures administered by telephone interview in a longitudinal localized prostate cancer study. *Quality of Life Research*, 2016;25:2811-2823.
24. Magnus BE, Liu Y, He J, et al. Mode effects between computer self-administration and telephone interviewer-administration of the PROMIS pediatric measures, self- and proxy report. *Quality of Life Research*, 2016;25:1655-1665.
25. Perkins JJ and Sanson-Fisher RW. An examination of self- and telephone-administered modes of administration for the Australian SF-36. *Journal of Clinical Epidemiology*, 1998;51:969-973.

1  
2  
3 26. Erhart M, Wetzel RM, Krügel A, and Ravens-Sieberer U. Effects of phone versus mail survey methods on the  
4 measurement of health-related quality of life and emotional and behavioural problems in adolescents. *BMC Public*  
5 *Health*, 2009;491.  
6  
7  
8  
9  
10  
11  
12  
13  
14  
15  
16  
17  
18  
19  
20  
21  
22  
23  
24  
25  
26  
27  
28  
29  
30  
31  
32  
33  
34  
35  
36  
37  
38  
39  
40  
41  
42  
43  
44  
45  
46  
47  
48  
49  
50  
51  
52  
53  
54  
55  
56  
57  
58  
59  
60

For peer review only

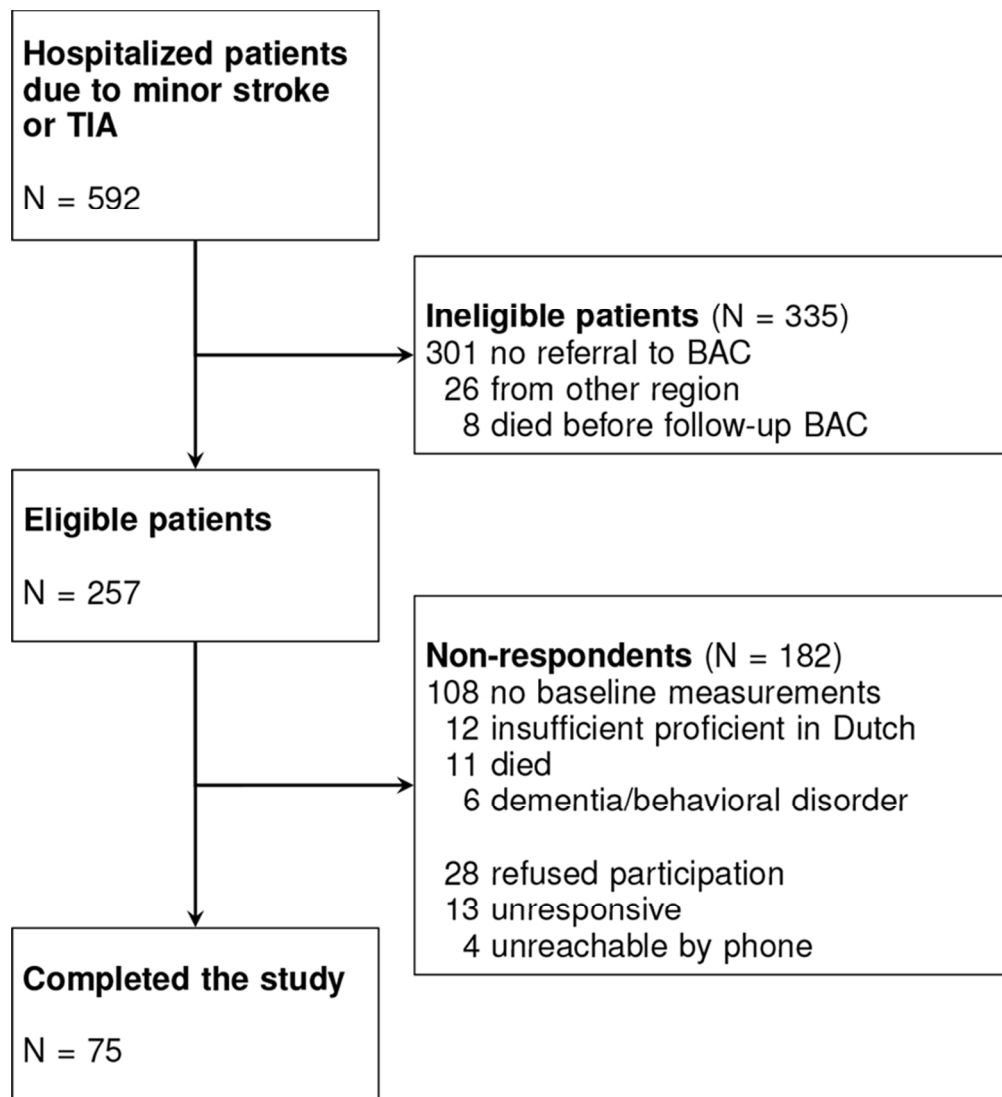

Figure 1. Flow chart of the study population

90x98mm (300 x 300 DPI)

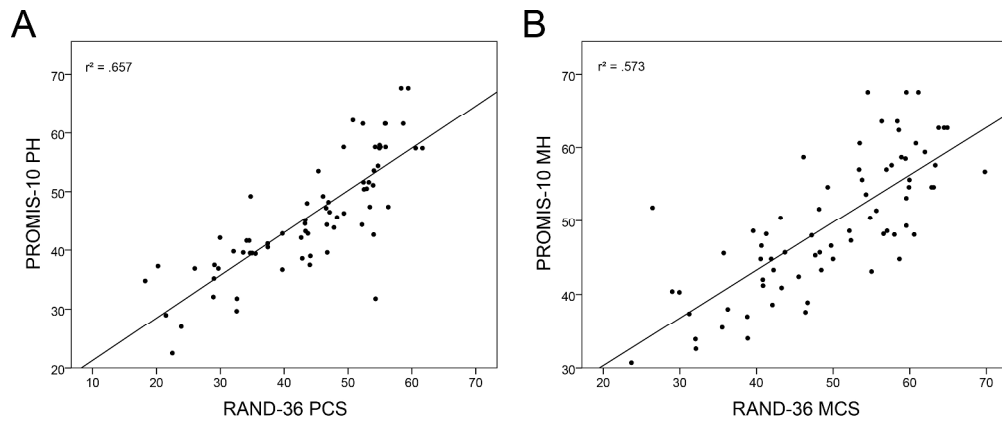

Figure 2. Scatterplots of PROMIS-10 and RAND-36 physical (A) and mental health scores (B).

337x141mm (300 x 300 DPI)

Peer review only

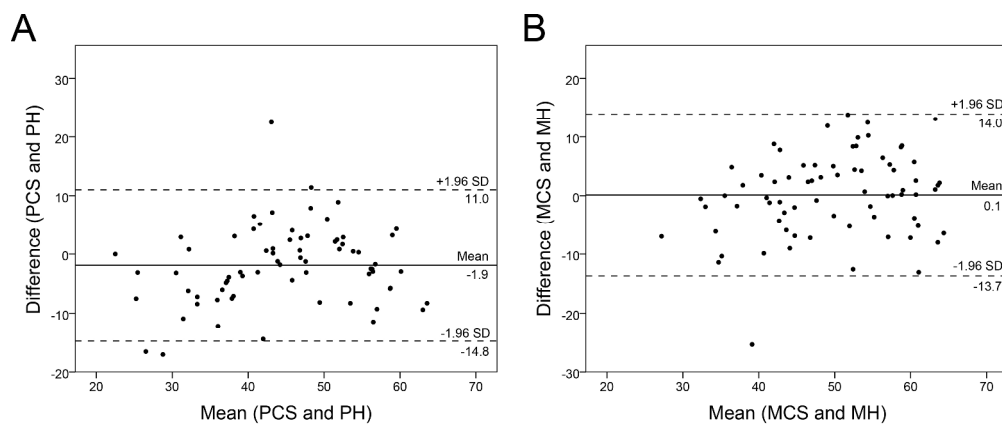

Figure 3. Bland-Altman plots of PROMIS-10 and RAND-36 physical (A) and mental health scores (B).

337x141mm (300 x 300 DPI)

Peer review only

STROBE Statement—checklist of items that should be included in reports of observational studies

|                           | <b>Item No.</b> | <b>Recommendation</b>                                                                               | <b>Page No.</b> | <b>Relevant text from manuscript</b>                                                                                                                                                                                                                                                                                                                                       |
|---------------------------|-----------------|-----------------------------------------------------------------------------------------------------|-----------------|----------------------------------------------------------------------------------------------------------------------------------------------------------------------------------------------------------------------------------------------------------------------------------------------------------------------------------------------------------------------------|
| <b>Title and abstract</b> | 1               | (a) Indicate the study’s design with a commonly used term in the title or the abstract              | 2               | “Design: Observational cohort study.”                                                                                                                                                                                                                                                                                                                                      |
|                           |                 | (b) Provide in the abstract an informative and balanced summary of what was done and what was found | 2               | “PROMIS-10 was found to strongly correlate with the RAND-36. Paper-and-pencil assessment was found to have a higher correlation than telephone assessment. This study provides support for the use of the Dutch PROMIS-10 in assessing health status in patients after TIA and minor stroke.”                                                                              |
| <b>Introduction</b>       |                 |                                                                                                     |                 |                                                                                                                                                                                                                                                                                                                                                                            |
| Background/rationale      | 2               | Explain the scientific background and rationale for the investigation being reported                |                 | “... previous studies in TIA and minor stroke patients found high prevalence of dysfunction across all domains of health, of which cognitive and emotional problems were most notable [3-6]. These symptoms may be overlooked with conventional clinical measures such as the neurological examination or the Barthel Index, but can be a major contributor to an impaired |

|                |   |                                                                                                                                 |   |                                                                                                                                                                                                                                                                                                                                                                                                                         |
|----------------|---|---------------------------------------------------------------------------------------------------------------------------------|---|-------------------------------------------------------------------------------------------------------------------------------------------------------------------------------------------------------------------------------------------------------------------------------------------------------------------------------------------------------------------------------------------------------------------------|
|                |   |                                                                                                                                 |   | performance of activities of daily living and a diminished quality of life (QoL)”                                                                                                                                                                                                                                                                                                                                       |
| Objectives     | 3 | State specific objectives, including any prespecified hypotheses                                                                | 4 | “... to investigate the construct validity and reliability of the Dutch PROMIS-10 in TIA and minor stroke patients in the Netherlands. We also aim to evaluate different assessment methods of the PROMIS-10: on paper (filled in by the patient) assessment versus assessment through the telephone.”                                                                                                                  |
| <b>Methods</b> |   |                                                                                                                                 |   |                                                                                                                                                                                                                                                                                                                                                                                                                         |
| Study design   | 4 | Present key elements of study design early in the paper                                                                         | 4 | “... single-centre observational cohort study ...”                                                                                                                                                                                                                                                                                                                                                                      |
| Setting        | 5 | Describe the setting, locations, and relevant dates, including periods of recruitment, exposure, follow-up, and data collection | 4 | “... at OLVG Oost hospital. Between January 2016 and January 2017 medical records of patients diagnosed with a TIA or minor stroke one year ago were screened for eligibility ...”<br><br>“Eligible patients were approached by telephone for study participation. (...) study materials were sent by mail; study information, consent form, PROMIS-10, RAND-36 (...), and a short form for obtaining socio-demographic |

1  
2  
3  
4  
5  
6  
7  
8  
9  
10  
11  
12  
13  
14  
15  
16  
17  
18  
19  
20  
21  
22  
23  
24  
25  
26  
27  
28  
29  
30  
31  
32  
33  
34  
35  
36  
37  
38  
39  
40  
41  
42  
43  
44  
45  
46  
47

|              |   |                                                                                                                                                                                                                                                                                                                                                                                                                                                                                    |   |                                                                                                                                                                                                                                                                                                                                                                                                                                                                                           |
|--------------|---|------------------------------------------------------------------------------------------------------------------------------------------------------------------------------------------------------------------------------------------------------------------------------------------------------------------------------------------------------------------------------------------------------------------------------------------------------------------------------------|---|-------------------------------------------------------------------------------------------------------------------------------------------------------------------------------------------------------------------------------------------------------------------------------------------------------------------------------------------------------------------------------------------------------------------------------------------------------------------------------------------|
|              |   |                                                                                                                                                                                                                                                                                                                                                                                                                                                                                    |   | data. PROMIS-10 was assessed on paper from January 1 to July 31, 2016 and by telephone from August 1, 2016 to January 31, 2017. On paper assessments of the PROMIS-10 and RAND-36 were completed by the patients at home on their own or with help of a proxy. Telephone assessments of the PROMIS-10 were carried out by reading out the exact questions and marking the given answers. Clinical data were extracted from medical records.”                                              |
| Participants | 6 | <p>(a) <i>Cohort study</i>—Give the eligibility criteria, and the sources and methods of selection of participants. Describe methods of follow-up</p> <p><i>Case-control study</i>—Give the eligibility criteria, and the sources and methods of case ascertainment and control selection. Give the rationale for the choice of cases and controls</p> <p><i>Cross-sectional study</i>—Give the eligibility criteria, and the sources and methods of selection of participants</p> | 4 | <p>“Eligibility included a clinical diagnosis of TIA or minor stroke followed by discharge without inpatient rehabilitation treatment. (...) TIA and minor stroke were defined as (...) symptoms of stroke on admission that fully resolves within 24 hours and three days, respectively.”</p> <p>“Exclusion criteria were: age below 18 years, persistent neurological symptoms three days post-stroke, insufficient proficiency in Dutch, dementia or any behavioural disorder ...”</p> |



|           |   |                                                                                                                                             |      |                                                                                                                                                                                                                                                                                                                                                                                                                                                                                                                                                                                                                                                                                                                                                                          |
|-----------|---|---------------------------------------------------------------------------------------------------------------------------------------------|------|--------------------------------------------------------------------------------------------------------------------------------------------------------------------------------------------------------------------------------------------------------------------------------------------------------------------------------------------------------------------------------------------------------------------------------------------------------------------------------------------------------------------------------------------------------------------------------------------------------------------------------------------------------------------------------------------------------------------------------------------------------------------------|
|           |   | (b) <i>Cohort study</i> —For matched studies, give matching criteria and number of exposed and unexposed                                    | n/a  | n/a                                                                                                                                                                                                                                                                                                                                                                                                                                                                                                                                                                                                                                                                                                                                                                      |
|           |   | <i>Case-control study</i> —For matched studies, give matching criteria and the number of controls per case                                  |      |                                                                                                                                                                                                                                                                                                                                                                                                                                                                                                                                                                                                                                                                                                                                                                          |
| Variables | 7 | Clearly define all outcomes, exposures, predictors, potential confounders, and effect modifiers.<br>Give diagnostic criteria, if applicable | 4, 5 | <p>“PROMIS-10 (...) Physical health (PH) and mental health (MH) T-scores”</p> <p>“RAND-36 (...) physical (PCS) and mental (MCS) component score.”</p> <p>“marital status, level of education ( (...) low (primary school), average (secondary school low or medium level), and high (highest level secondary school, and/or college degree, and/or university degree) [20], living arrangement, and work status.”</p> <p>“... clinical diagnosis of TIA or minor stroke followed by discharge without inpatient rehabilitation treatment. MRI is not part of the standard diagnostic work-up of stroke but was performed whenever other causes than ischemia could not be ruled out. For this study TIA and minor stroke were defined as acute neurological deficits</p> |

1  
2  
3  
4  
5  
6  
7  
8  
9  
10  
11  
12  
13  
14  
15  
16  
17  
18  
19  
20  
21  
22  
23  
24  
25  
26  
27  
28  
29  
30  
31  
32  
33  
34  
35  
36  
37  
38  
39  
40  
41  
42  
43  
44  
45  
46  
47

For peer review only

|                              |    |                                                                                                                                                                                      |      |                                                                                                                                                                                                                                                                                                                                                                                                                                                    |
|------------------------------|----|--------------------------------------------------------------------------------------------------------------------------------------------------------------------------------------|------|----------------------------------------------------------------------------------------------------------------------------------------------------------------------------------------------------------------------------------------------------------------------------------------------------------------------------------------------------------------------------------------------------------------------------------------------------|
|                              |    |                                                                                                                                                                                      |      | with symptoms of stroke on admission that fully resolves within 24 hours and three days, respectively.”                                                                                                                                                                                                                                                                                                                                            |
| Data sources/<br>measurement | 8* | For each variable of interest, give sources of data and details of methods of assessment (measurement). Describe comparability of assessment methods if there is more than one group | 4    | “Clinical data were extracted from medical records.”<br><br>“On paper assessments of the PROMIS-10 and RAND-36 were completed by the patients at home on their own or with help of a proxy. Telephone assessments of the PROMIS-10 were carried out by reading out the exact questions and marking the given answers.”                                                                                                                             |
| Bias                         | 9  | Describe any efforts to address potential sources of bias                                                                                                                            | 4, 5 | “Between January 2016 and January 2017 medical records of patients diagnosed with a TIA or minor stroke one year ago were screened for eligibility”<br><br>“Eligibility included a clinical diagnosis of TIA or minor stroke followed by discharge without inpatient rehabilitation treatment. (...) TIA and minor stroke were defined as (...) symptoms of stroke on admission that fully resolves within 24 hours and three days, respectively.” |

1  
2  
3  
4  
5  
6  
7  
8  
9  
10  
11  
12  
13  
14  
15  
16  
17  
18  
19  
20  
21  
22  
23  
24  
25  
26  
27  
28  
29  
30  
31  
32  
33  
34  
35  
36  
37  
38  
39  
40  
41  
42  
43  
44  
45  
46  
47

For peer review only

“If during the re-evaluation residual or new symptoms are present or suspected, patients are referred to the Beroerte Adviescentrum (...) patients who were not referred to the BAC or did not complete baseline measurements were deemed ineligible.”

“On paper assessments of the PROMIS-10 and RAND-36 were completed by the patients at home on their own or with help of a proxy. Telephone assessments of the PROMIS-10 were carried out by reading out the exact questions and marking the given answers. Clinical data were extracted from medical records.”

“Socio-demographic data collected were: marital status, level of education (...), living arrangement, and work status.”

---

|            |    |                                           |   |                                                                                                                                                     |
|------------|----|-------------------------------------------|---|-----------------------------------------------------------------------------------------------------------------------------------------------------|
| Study size | 10 | Explain how the study size was arrived at | 4 | “Between January 2016 and January 2017 medical records of patients diagnosed with a TIA or minor stroke one year ago were screened for eligibility” |
|------------|----|-------------------------------------------|---|-----------------------------------------------------------------------------------------------------------------------------------------------------|

---

1  
2  
3  
4  
5  
6  
7  
8  
9  
10  
11  
12  
13  
14  
15  
16  
17  
18  
19  
20  
21  
22  
23  
24  
25  
26  
27  
28  
29  
30  
31  
32  
33  
34  
35  
36  
37  
38  
39  
40  
41  
42  
43  
44  
45  
46  
47

Continued on next page

For peer review only

|    |                        |    |                                                                                                                              |      |                                                                                                                                                                                                                                                                                                                                                                                                                                                                                                                                                                                                                                                                                                                                                                                                   |
|----|------------------------|----|------------------------------------------------------------------------------------------------------------------------------|------|---------------------------------------------------------------------------------------------------------------------------------------------------------------------------------------------------------------------------------------------------------------------------------------------------------------------------------------------------------------------------------------------------------------------------------------------------------------------------------------------------------------------------------------------------------------------------------------------------------------------------------------------------------------------------------------------------------------------------------------------------------------------------------------------------|
| 1  |                        |    |                                                                                                                              |      |                                                                                                                                                                                                                                                                                                                                                                                                                                                                                                                                                                                                                                                                                                                                                                                                   |
| 2  |                        |    |                                                                                                                              |      |                                                                                                                                                                                                                                                                                                                                                                                                                                                                                                                                                                                                                                                                                                                                                                                                   |
| 3  |                        |    |                                                                                                                              |      |                                                                                                                                                                                                                                                                                                                                                                                                                                                                                                                                                                                                                                                                                                                                                                                                   |
| 4  | Quantitative variables | 11 | Explain how quantitative variables were handled in the analyses. If applicable, describe which groupings were chosen and why | 5    | “Numerical variables were summarized by the mean $\pm$ SD, and frequencies and percentages were used for binary and categorical variables.”                                                                                                                                                                                                                                                                                                                                                                                                                                                                                                                                                                                                                                                       |
| 5  |                        |    |                                                                                                                              |      |                                                                                                                                                                                                                                                                                                                                                                                                                                                                                                                                                                                                                                                                                                                                                                                                   |
| 6  |                        |    |                                                                                                                              |      |                                                                                                                                                                                                                                                                                                                                                                                                                                                                                                                                                                                                                                                                                                                                                                                                   |
| 7  |                        |    |                                                                                                                              |      |                                                                                                                                                                                                                                                                                                                                                                                                                                                                                                                                                                                                                                                                                                                                                                                                   |
| 8  |                        |    |                                                                                                                              |      |                                                                                                                                                                                                                                                                                                                                                                                                                                                                                                                                                                                                                                                                                                                                                                                                   |
| 9  |                        |    |                                                                                                                              |      |                                                                                                                                                                                                                                                                                                                                                                                                                                                                                                                                                                                                                                                                                                                                                                                                   |
| 10 | Statistical methods    | 12 | (a) Describe all statistical methods, including those used to control for confounding                                        | 5, 6 | “... correlation between PROMIS-10 and RAND-36 was assessed by calculating Pearson's correlation coefficient ( $r$ ), with a bias corrected and accelerated bootstrapping (BCa) method providing 95% confidence intervals. Agreement between PROMIS-10 and RAND-36 was assessed by constructing Bland-Altman plots with horizontal lines representing 95% limits of agreement (LOA) (mean difference $\pm 1.96$ SD). (...)For the internal consistency of the PROMIS-10, reliability analysis was used to calculate Cronbach's $\alpha$ s for both physical (4 items) and mental (4 items) subscales. A cut-off point of $\geq .70$ was chosen for indication of good reliability ( $\alpha$ ) and correlation ( $r$ ) [21]. A p-value of $< .05$ was considered to be statistically significant. |
| 11 |                        |    |                                                                                                                              |      |                                                                                                                                                                                                                                                                                                                                                                                                                                                                                                                                                                                                                                                                                                                                                                                                   |
| 12 |                        |    |                                                                                                                              |      |                                                                                                                                                                                                                                                                                                                                                                                                                                                                                                                                                                                                                                                                                                                                                                                                   |
| 13 |                        |    |                                                                                                                              |      |                                                                                                                                                                                                                                                                                                                                                                                                                                                                                                                                                                                                                                                                                                                                                                                                   |
| 14 |                        |    |                                                                                                                              |      |                                                                                                                                                                                                                                                                                                                                                                                                                                                                                                                                                                                                                                                                                                                                                                                                   |
| 15 |                        |    |                                                                                                                              |      |                                                                                                                                                                                                                                                                                                                                                                                                                                                                                                                                                                                                                                                                                                                                                                                                   |
| 16 |                        |    |                                                                                                                              |      |                                                                                                                                                                                                                                                                                                                                                                                                                                                                                                                                                                                                                                                                                                                                                                                                   |
| 17 |                        |    |                                                                                                                              |      |                                                                                                                                                                                                                                                                                                                                                                                                                                                                                                                                                                                                                                                                                                                                                                                                   |
| 18 |                        |    |                                                                                                                              |      |                                                                                                                                                                                                                                                                                                                                                                                                                                                                                                                                                                                                                                                                                                                                                                                                   |
| 19 |                        |    |                                                                                                                              |      |                                                                                                                                                                                                                                                                                                                                                                                                                                                                                                                                                                                                                                                                                                                                                                                                   |
| 20 |                        |    |                                                                                                                              |      |                                                                                                                                                                                                                                                                                                                                                                                                                                                                                                                                                                                                                                                                                                                                                                                                   |
| 21 |                        |    |                                                                                                                              |      |                                                                                                                                                                                                                                                                                                                                                                                                                                                                                                                                                                                                                                                                                                                                                                                                   |
| 22 |                        |    |                                                                                                                              |      |                                                                                                                                                                                                                                                                                                                                                                                                                                                                                                                                                                                                                                                                                                                                                                                                   |
| 23 |                        |    |                                                                                                                              |      |                                                                                                                                                                                                                                                                                                                                                                                                                                                                                                                                                                                                                                                                                                                                                                                                   |
| 24 |                        |    |                                                                                                                              |      |                                                                                                                                                                                                                                                                                                                                                                                                                                                                                                                                                                                                                                                                                                                                                                                                   |
| 25 |                        |    |                                                                                                                              |      |                                                                                                                                                                                                                                                                                                                                                                                                                                                                                                                                                                                                                                                                                                                                                                                                   |
| 26 |                        |    |                                                                                                                              |      |                                                                                                                                                                                                                                                                                                                                                                                                                                                                                                                                                                                                                                                                                                                                                                                                   |
| 27 |                        |    |                                                                                                                              |      |                                                                                                                                                                                                                                                                                                                                                                                                                                                                                                                                                                                                                                                                                                                                                                                                   |
| 28 |                        |    |                                                                                                                              |      |                                                                                                                                                                                                                                                                                                                                                                                                                                                                                                                                                                                                                                                                                                                                                                                                   |
| 29 |                        |    |                                                                                                                              |      |                                                                                                                                                                                                                                                                                                                                                                                                                                                                                                                                                                                                                                                                                                                                                                                                   |
| 30 |                        |    |                                                                                                                              |      |                                                                                                                                                                                                                                                                                                                                                                                                                                                                                                                                                                                                                                                                                                                                                                                                   |
| 31 |                        |    |                                                                                                                              |      |                                                                                                                                                                                                                                                                                                                                                                                                                                                                                                                                                                                                                                                                                                                                                                                                   |
| 32 |                        |    |                                                                                                                              |      |                                                                                                                                                                                                                                                                                                                                                                                                                                                                                                                                                                                                                                                                                                                                                                                                   |
| 33 |                        |    |                                                                                                                              |      |                                                                                                                                                                                                                                                                                                                                                                                                                                                                                                                                                                                                                                                                                                                                                                                                   |
| 34 |                        |    |                                                                                                                              |      |                                                                                                                                                                                                                                                                                                                                                                                                                                                                                                                                                                                                                                                                                                                                                                                                   |
| 35 |                        |    |                                                                                                                              |      |                                                                                                                                                                                                                                                                                                                                                                                                                                                                                                                                                                                                                                                                                                                                                                                                   |
| 36 |                        |    |                                                                                                                              |      |                                                                                                                                                                                                                                                                                                                                                                                                                                                                                                                                                                                                                                                                                                                                                                                                   |
| 37 |                        |    | (b) Describe any methods used to examine subgroups and interactions                                                          | 5, 6 | “Differences in patient characteristics were assessed using the independent samples $t$ -test and $\chi^2$ test.”                                                                                                                                                                                                                                                                                                                                                                                                                                                                                                                                                                                                                                                                                 |
| 38 |                        |    |                                                                                                                              |      |                                                                                                                                                                                                                                                                                                                                                                                                                                                                                                                                                                                                                                                                                                                                                                                                   |
| 39 |                        |    |                                                                                                                              |      |                                                                                                                                                                                                                                                                                                                                                                                                                                                                                                                                                                                                                                                                                                                                                                                                   |
| 40 |                        |    |                                                                                                                              |      |                                                                                                                                                                                                                                                                                                                                                                                                                                                                                                                                                                                                                                                                                                                                                                                                   |
| 41 |                        |    |                                                                                                                              |      |                                                                                                                                                                                                                                                                                                                                                                                                                                                                                                                                                                                                                                                                                                                                                                                                   |
| 42 |                        |    |                                                                                                                              |      |                                                                                                                                                                                                                                                                                                                                                                                                                                                                                                                                                                                                                                                                                                                                                                                                   |
| 43 |                        |    |                                                                                                                              |      |                                                                                                                                                                                                                                                                                                                                                                                                                                                                                                                                                                                                                                                                                                                                                                                                   |
| 44 |                        |    |                                                                                                                              |      |                                                                                                                                                                                                                                                                                                                                                                                                                                                                                                                                                                                                                                                                                                                                                                                                   |
| 45 |                        |    |                                                                                                                              |      |                                                                                                                                                                                                                                                                                                                                                                                                                                                                                                                                                                                                                                                                                                                                                                                                   |
| 46 |                        |    |                                                                                                                              |      |                                                                                                                                                                                                                                                                                                                                                                                                                                                                                                                                                                                                                                                                                                                                                                                                   |
| 47 |                        |    |                                                                                                                              |      |                                                                                                                                                                                                                                                                                                                                                                                                                                                                                                                                                                                                                                                                                                                                                                                                   |

1  
2  
3  
4  
5  
6  
7  
8  
9  
10  
11  
12  
13  
14  
15  
16  
17  
18  
19  
20  
21  
22  
23  
24  
25  
26  
27  
28  
29  
30  
31  
32  
33  
34  
35  
36  
37  
38  
39  
40  
41  
42  
43  
44  
45  
46  
47

|                |                                                                                                                                                                                                                                                                                   |                                                                                                                                                                                                   |     |                                                                                                                                                                                                                                                                                                                                                                                                                                                                 |
|----------------|-----------------------------------------------------------------------------------------------------------------------------------------------------------------------------------------------------------------------------------------------------------------------------------|---------------------------------------------------------------------------------------------------------------------------------------------------------------------------------------------------|-----|-----------------------------------------------------------------------------------------------------------------------------------------------------------------------------------------------------------------------------------------------------------------------------------------------------------------------------------------------------------------------------------------------------------------------------------------------------------------|
|                |                                                                                                                                                                                                                                                                                   |                                                                                                                                                                                                   |     | “An independent samples t-test was performed for assessing differences between assessment methods of the PROMIS-10. “                                                                                                                                                                                                                                                                                                                                           |
|                | (c) Explain how missing data were addressed                                                                                                                                                                                                                                       |                                                                                                                                                                                                   | 6   | “... two had missing values in the physical total score, and one in both physical and mental total score of the PROMIS-10, another patient had missing values in both component scores of the RAND-36.”                                                                                                                                                                                                                                                         |
|                | (d) Cohort study—If applicable, explain how loss to follow-up was addressed<br>Case-control study—If applicable, explain how matching of cases and controls was addressed<br>Cross-sectional study—If applicable, describe analytical methods taking account of sampling strategy |                                                                                                                                                                                                   | n/a | n/a                                                                                                                                                                                                                                                                                                                                                                                                                                                             |
|                | (e) Describe any sensitivity analyses                                                                                                                                                                                                                                             |                                                                                                                                                                                                   | n/a | n/a                                                                                                                                                                                                                                                                                                                                                                                                                                                             |
| <b>Results</b> |                                                                                                                                                                                                                                                                                   |                                                                                                                                                                                                   |     |                                                                                                                                                                                                                                                                                                                                                                                                                                                                 |
| Participants   | 13*                                                                                                                                                                                                                                                                               | (a) Report numbers of individuals at each stage of study—eg numbers potentially eligible, examined for eligibility, confirmed eligible, included in the study, completing follow-up, and analysed | 6   | “... 592 patients were identified who were diagnosed with a TIA or minor stroke one year prior to the assessment (...) 301 patients were not referred to BAC for follow-up care, 26 patients originated from a different region or country, and 8 died before BAC follow-up. Of the remaining 257 eligible patients, 182 were non-respondents (108 had no baseline measurements, 12 were insufficient proficient in Dutch, 11 died before follow-up at one year |

1  
2  
3  
4  
5  
6  
7  
8  
9  
10  
11  
12  
13  
14  
15  
16  
17  
18  
19  
20  
21  
22  
23  
24  
25  
26  
27  
28  
29  
30  
31  
32  
33  
34  
35  
36  
37  
38  
39  
40  
41  
42  
43  
44  
45  
46  
47

|                  |                                                      |                                                                                                                                          |   |                                                                                                                                                                                                                                                                                                                                                                                                                                                                       |
|------------------|------------------------------------------------------|------------------------------------------------------------------------------------------------------------------------------------------|---|-----------------------------------------------------------------------------------------------------------------------------------------------------------------------------------------------------------------------------------------------------------------------------------------------------------------------------------------------------------------------------------------------------------------------------------------------------------------------|
|                  |                                                      |                                                                                                                                          |   | post-stroke, 6 had dementia or a behavioural disorder, 28 refused participation, 13 were not responsive after initial consent, and 4 were not reachable by phone) and 75 patients were included for the study ...”                                                                                                                                                                                                                                                    |
|                  | (b) Give reasons for non-participation at each stage |                                                                                                                                          | 6 | <p>“... 301 patients were not referred to BAC for follow-up care, 26 patients originated from a different region or country, and 8 died before BAC follow-up. “</p> <p>“... 108 had no baseline measurements, 12 were insufficient proficient in Dutch, 11 died before follow-up at one year post-stroke, 6 had dementia or a behavioural disorder, 28 refused participation, 13 were not responsive after initial consent, and 4 were not reachable by phone...”</p> |
|                  | (c) Consider use of a flow diagram                   |                                                                                                                                          | 6 | “Figure 1. Flow chart of the study population”                                                                                                                                                                                                                                                                                                                                                                                                                        |
| Descriptive data | 14*                                                  | (a) Give characteristics of study participants (eg demographic, clinical, social) and information on exposures and potential confounders | 6 | “Of the 75 included patients, mean age was 68.9 ± 11.2 years, 51 (68.0%) were male, 60 (80.0%) had their first-ever ischemic event, 49 (65.3%) had the diagnosis minor stroke and 26 (34.7%) TIA. The ischemic event was located in the                                                                                                                                                                                                                               |

|              |     |                                                                                                                                                                                                              |  |   |                                                                                                                                                                                                         |
|--------------|-----|--------------------------------------------------------------------------------------------------------------------------------------------------------------------------------------------------------------|--|---|---------------------------------------------------------------------------------------------------------------------------------------------------------------------------------------------------------|
|              |     |                                                                                                                                                                                                              |  |   | left hemisphere in 30 (40.0%) patients, 23 (30.7%) in the right hemisphere, and 22 (29.3%) were vertebrobasilar.”                                                                                       |
|              |     | (b) Indicate number of participants with missing data for each variable of interest                                                                                                                          |  | 6 | “... two had missing values in the physical total score, and one in both physical and mental total score of the PROMIS-10, another patient had missing values in both component scores of the RAND-36.” |
|              |     | (c) Cohort study—Summarise follow-up time (eg, average and total amount)                                                                                                                                     |  | 7 | “Days between onset and follow-up, mean (SD)”                                                                                                                                                           |
| Outcome data | 15* | Cohort study—Report numbers of outcome events or summary measures over time                                                                                                                                  |  | 6 | “Mean (SD) scores for the PROMIS-10 were 45.8 (9.9) for PH, and 49.6 (9.1) for MH. Scores for the RAND-36 were 43.7 (11.4) for PCS, and 49.9 (10.7) for MCS.”                                           |
|              |     | Case-control study—Report numbers in each exposure category, or summary measures of exposure                                                                                                                 |  |   |                                                                                                                                                                                                         |
|              |     | Cross-sectional study—Report numbers of outcome events or summary measures                                                                                                                                   |  |   |                                                                                                                                                                                                         |
| Main results | 16  | (a) Give unadjusted estimates and, if applicable, confounder-adjusted estimates and their precision (eg, 95% confidence interval). Make clear which confounders were adjusted for and why they were included |  | 8 | “PROMIS-10 and RAND-36 physical and mental scores correlated significantly, $r = .81$ , BCa CI [.69, .88], $p < .001$ , and $r = .76$ , BCa CI [.64, .85], $p < .001$ , respectively ...”               |
|              |     | (b) Report category boundaries when continuous variables were categorized                                                                                                                                    |  | 5 | “... level of education (assessed on the Dutch 7-point scale ‘schaal van Verhage’, and afterwards stratified into three groups: low (primary school), average (secondary school                         |



1  
2  
3  
4  
5  
6  
7  
8  
9  
10  
11  
12  
13  
14  
15  
16  
17  
18  
19  
20  
21  
22  
23  
24  
25  
26  
27  
28  
29  
30  
31  
32  
33  
34  
35  
36  
37  
38  
39  
40  
41  
42  
43  
44  
45  
46  
47

---

low or medium level), and high  
(highest level secondary school,  
and/or college degree, and/or  
university degree) [20], ...”

---

|                                                                                                                  |     |     |
|------------------------------------------------------------------------------------------------------------------|-----|-----|
| (c) If relevant, consider translating estimates of relative risk into absolute risk for a meaningful time period | n/a | n/a |
|------------------------------------------------------------------------------------------------------------------|-----|-----|

---

Continued on next page

For peer review only

1  
2  
3  
4  
5  
6  
7  
8  
9  
10  
11  
12  
13  
14  
15  
16  
17  
18  
19  
20  
21  
22  
23  
24  
25  
26  
27  
28  
29  
30  
31  
32  
33  
34  
35  
36  
37  
38  
39  
40  
41  
42  
43  
44  
45  
46  
47

|                   |    |                                                                                                                                                            |        |                                                                                                                                                                                                                                                                                                                                                                                                                                                  |
|-------------------|----|------------------------------------------------------------------------------------------------------------------------------------------------------------|--------|--------------------------------------------------------------------------------------------------------------------------------------------------------------------------------------------------------------------------------------------------------------------------------------------------------------------------------------------------------------------------------------------------------------------------------------------------|
| Other analyses    | 17 | Report other analyses done—eg analyses of subgroups and interactions, and sensitivity analyses                                                             | 11, 12 | <p>“... mental health was found to be similar when comparing gender.”</p> <p>“However, when taking diagnosis into account, physical and mental scores between the two groups did not significantly differ for both PROMIS-10 and RAND-36.”</p>                                                                                                                                                                                                   |
| <b>Discussion</b> |    |                                                                                                                                                            |        |                                                                                                                                                                                                                                                                                                                                                                                                                                                  |
| Key results       | 18 | Summarise key results with reference to study objectives                                                                                                   | 10, 11 | <p>“... overall strong correlation between the PROMIS-10 and the RAND-36. QoL attributed to physical health was found to have a higher correlation than QoL attributed to mental health.”</p> <p>“... we compared two assessment methods of the PROMIS-10. Both physical and mental health assessed by telephone, although slightly inferior to on-paper assessment, was found to have a strong correlation with on-paper assessed RAND-36.”</p> |
| Limitations       | 19 | Discuss limitations of the study, taking into account sources of potential bias or imprecision. Discuss both direction and magnitude of any potential bias | 12, 13 | <p>“... small sample size ...”</p> <p>“... mean (<i>SD</i>) of 9.4 (14.7) days between assessment of RAND-36 on paper and assessment of PROMIS-10 by telephone ...”</p>                                                                                                                                                                                                                                                                          |

1  
2  
3  
4  
5  
6  
7  
8  
9  
10  
11  
12  
13  
14  
15  
16  
17  
18  
19  
20  
21  
22  
23  
24  
25  
26  
27  
28  
29  
30  
31  
32  
33  
34  
35  
36  
37  
38  
39  
40  
41  
42  
43  
44  
45  
46  
47

|                  |    |                                                                                                                                                                            |    |                                                                                                                                                                                                                                                                                                                                                                                                         |
|------------------|----|----------------------------------------------------------------------------------------------------------------------------------------------------------------------------|----|---------------------------------------------------------------------------------------------------------------------------------------------------------------------------------------------------------------------------------------------------------------------------------------------------------------------------------------------------------------------------------------------------------|
|                  |    |                                                                                                                                                                            |    | <p>“... no information regarding test-retest reliability of PROMIS-10 as is was only assessed at one time point.”</p> <p>“... confounding factors such as individual personality traits, extent of social support, socio-economic status and ethnicity was not accounted for in this study, while these factors undoubtedly impact self-reported quality of life.”</p>                                  |
| Interpretation   | 20 | Give a cautious overall interpretation of results considering objectives, limitations, multiplicity of analyses, results from similar studies, and other relevant evidence | 13 | <p>“... support for the use of the Dutch version of the PROMIS-10 in patients after minor stroke or TIA in the Netherlands. Despite satisfactory validity of telephone assessment, careful interpretation is advised, especially when addressing mental health status. Additional data and further research with the PROMIS-10 in stroke patients is desirable for establishing more firm results.”</p> |
| Generalisability | 21 | Discuss the generalisability (external validity) of the study results                                                                                                      | 12 | <p>“The generalizability of our results is reduced due to our small sample size.”</p> <p>“Timing of measurement of health status in stroke should also be taken into account. We assessed the PROMIS-10 at one year post-</p>                                                                                                                                                                           |

1  
2  
3  
4  
5  
6  
7  
8  
9  
10  
11  
12  
13  
14  
15  
16  
17  
18  
19  
20  
21  
22  
23  
24  
25  
26  
27  
28  
29  
30  
31  
32  
33  
34  
35  
36  
37  
38  
39  
40  
41  
42  
43  
44  
45  
46  
47

---

stroke...”

---

**Other information**

|         |    |                                                                                                                                                               |    |                                                                                |
|---------|----|---------------------------------------------------------------------------------------------------------------------------------------------------------------|----|--------------------------------------------------------------------------------|
| Funding | 22 | Give the source of funding and the role of the funders for the present study and, if applicable, for the original study on which the present article is based | 14 | “This research is funded by the Foundation Teaching Hospital OLVG, Amsterdam.” |
|---------|----|---------------------------------------------------------------------------------------------------------------------------------------------------------------|----|--------------------------------------------------------------------------------|

\*Give information separately for cases and controls in case-control studies and, if applicable, for exposed and unexposed groups in cohort and cross-sectional studies.

**Note:** An Explanation and Elaboration article discusses each checklist item and gives methodological background and published examples of transparent reporting. The STROBE checklist is best used in conjunction with this article (freely available on the Web sites of PLoS Medicine at <http://www.plosmedicine.org/>, Annals of Internal Medicine at <http://www.annals.org/>, and Epidemiology at <http://www.epidem.com/>). Information on the STROBE Initiative is available at [www.strobe-statement.org](http://www.strobe-statement.org).

For peer review only
